# Supplementary material
Source: Research Square preprint supplement (doi:10.21203/rs.3.rs-8965697/v1)
Supplement: Supplementary file 1 [file 0ab6a76475d0d3479081722b.xlsx]

## Sheet: Data
Sample	Year	OC	AR	OCAR	BNC	FNC	Feo/Fed	Pr/Ph	RCP	MineralOC	PC1	PC2	Group	BR	t
EH-1	2022	52.4462	1.28467	67.3762	0.0888394	0.389472	0.465607	0.222143	29.7129	16.4578	2.54851	1.57629	Q1	0.504951	1
EH-2	2019	34.5261	1.47552	50.944	0.0800204	0.487979	0.590902	0.205768	30.4785	17.1036	1.452	0.761416	Q1	0.636288	4
EH-3	2015	24.2525	1.85697	45.0362	0.118356	0.53326	0.432308	0.258659	31.5789	15.6558	1.61074	0.922443	Q4	0.635091	13
EH-4	2010	21.9192	2.21837	48.6249	0.112949	0.492449	0.486892	0.274862	30.4306	17.1877	0.882202	0.116317	Q1	1.00631	17
EH-5	2006	22.2152	2.0681	45.9432	0.0942158	0.488079	0.383126	0.242205	28.0861	23.2564	1.20365	0.872549	Q1	0.976872	22
EH-6	2001	25.1461	1.52649	38.3852	0.0789539	0.556739	0.408315	0.193215	24.7368	25.1103	1.15421	1.35992	Q1	1.13438	30
EH-7	1993	23.8572	1.38621	33.0712	0.0691824	0.448752	0.38793	0.184988	22.1531	25.4337	2.27514	3.05102	Q1	0.865374	36
EH-8	1987	22.6201	1.45668	32.9502	0.0692648	0.384203	0.449001	0.221583	23.7321	26.5632	1.17981	1.47753	Q1	1.14564	42
EH-9	1981	22.9475	1.22614	28.1368	0.0760945	0.438765	0.444123	0.323348	24.1627	23.0212	1.22161	2.60125	Q1	0.971046	48
EH-10	1975	22.2926	1.1059	24.6533	0.0643808	0.425237	0.517508	0.535121	23.3493	21.8963	0.189931	0.736254	Q1	1.34013	53
EH-11	1970	18.3977	0.905408	16.6574	0.0520071	0.352255	0.443562	0.730576	20.3828	22.6235	0.245745	3.16612	Q1	0.714901	55
EH-12	1968	16.8477	1.22667	20.6666	0.0674402	0.351733	0.415375	0.824215	21.7703	24.2358	0.448411	0.657809	Q1	1.05575	58
EH-13	1965	17.2993	1.24695	21.5714	0.0739761	0.327394	0.411426	1.09302	24.067	22.5463	-0.61783	0.606914	Q2	1.09174	63
EH-14	1960	16.0603	1.41775	22.7695	0.0677679	0.340406	0.437777	0.848502	23.6842	25.5274	-0.545595	-0.661069	Q3	1.47757	8
EH-15	1955	15.8662	1.34773	21.3833	0.048244	0.308213	0.472189	0.823964	25.311	24.8849	0.0622689	0.798087	Q1	0.981	68
EH-16	1949	15.8477	1.21751	19.2947	0.0369799	0.325118	0.496279	0.640558	25.6459	26.5776	-1.3324	-0.601737	Q3	1.48533	74
EH-17	1946	15.7065	1.28794	20.229	0.0517804	0.328876	0.508947	0.726028	26.6507	27.3041	-0.959781	-0.0667997	Q3	1.22747	77
EH-18	1942	15.4653	1.19783	18.5248	0.0672817	0.351807	0.451706	0.831882	28.2297	28.4337	-0.957299	-0.350217	Q3	1.24124	81
EH-19	1938	15.6218	1.12776	17.6176	0.0650765	0.328141	0.551531	0.632159	30.2841	31.4146	-0.742373	-0.530948	Q3	1.3978	85
EH-20	1934	14.2858	1.01759	14.537	0.0711624	0.378101	0.567187	0.685021	28.3732	29.564	0.252096	0.12559	Q1	1.01663	89
EH-21	1931	15.1464	0.967616	14.6559	0.0457989	0.345365	0.599899	0.717549	29.7608	28.7603	-0.435821	-0.161691	Q3	1.18548	92
EH-22	1927	15.6545	1.17853	18.4493	0.0511884	0.309031	0.546501	0.644151	28.5646	30.1309	-0.701391	-0.325991	Q3	1.32363	96
EH-23	1921	16.2564	0.95799	15.5735	0.0647432	0.342752	0.616935	0.729599	27.7512	28.4413	-1.06349	0.609617	Q2	1.0322	102
EH-24	1916	17.8973	0.877967	15.7132	0.0634851	0.327442	0.540717	0.66843	23.756	26.5905	-1.89399	0.854078	Q2	1.07949	107
EH-25	1910	18.1932	0.858063	15.6109	0.0545638	0.314911	0.499608	0.537981	29.4258	25.948	-0.700555	0.913563	Q2	1.06527	113
EH-26	1904	13.6551	0.86826	11.8562	0.0709457	0.439729	0.525999	0.594917	23.1435	27.7213	-1.02913	0.365284	Q2	0.968458	119
EH-27	1899	19.3987	0.858488	16.6535	0.0536392	0.277769	0.582002	0.497068	24.756	29.9778	-1.12839	1.13232	Q2	1.11485	124
EH-28	1894	16.4654	0.798515	13.1479	0.0414036	0.356714	0.546803	0.439959	26.4593	29.6575	-1.51961	0.374298	Q2	1.14735	129
EH-29	1889	17.8863	0.738462	13.2083	0.0561688	0.33644	0.493257	0.545784	23.3206	26.6791	-1.86302	1.08402	Q2	1.0254	134
EH-30	1885	19.5788	0.74874	14.6594	0.0299327	0.31807	0.557205	0.53755	25.0383	26.9224	-1.27464	1.55622	Q2	1.01203	138
EH-31	1881	19.7987	0.768986	15.2249	0.048931	0.297982	0.530033	0.447848	19.8421	28.7763	-1.96144	1.37476	Q2	1.05264	142
EH-32	1876	19.5596	0.628697	12.2971	0.0214015	0.282857	0.490669	0.582207	19.9378	33.9591	-2.34016	1.82535	Q2	0.945141	147
EH-33	1871	18.8	0.638992	12.013	0.0598007	0.304746	0.474268	0.622868	25.6938	24.7529	-1.25887	1.12154	Q2	1.05974	152
EH-34	1864	18.0242	0.578971	10.4355	0.0736551	0.329501	0.534911	0.639071	23.7321	25.9622	-0.937582	1.62763	Q2	0.935365	159
EH-35	1857	18.3772	0.609283	11.1969	0.0605257	0.30391	0.584844	0.553444	21.311	26.5278	-1.03742	0.504816	Q2	1.23018	166
EH-36	1852	18.4347	0.51921	9.57149	0.057093	0.322875	0.570456	0.614469	22.4402	24.4353	-1.6858	0.779457	Q2	1.15839	171
EH-37	1848	18.3522	0.589608	10.8206	0.0514843	0.333614	0.567988	0.659219	22.488	23.5509	-1.40032	0.118946	Q2	1.34101	175
EH-38	1843	18.4555	0.619936	11.4412	0.0395312	0.331746	0.590768	0.561355	21.5789	25.2439	-0.615399	0.433861	Q2	1.23966	180
EH-39	1839	17.9828	0.600065	10.7909	0.0571975	0.320782	0.594266	0.667194	22.6316	23.6349	-0.892507	-0.18484	Q3	1.44428	184
EH-40	1835	18.7805	0.519945	9.76482	0.0719627	0.317628	0.567441	0.768953	20.7177	24.2806	-1.0267	0.751652	Q2	1.17787	188
EH-41	1831	19.55	0.520157	10.1691	0.0758597	0.300432	0.608505	0.825911	19.7608	24.6851	-0.81791	0.0604498	Q2	1.43286	192
EH-42	1826	20.2732	0.460184	9.32941	0.0495556	0.294242	0.572337	0.740298	20.3349	23.5591	-0.883195	2.01992	Q2	0.954623	197
EH-43	1822	18.7951	0.560666	10.5378	0.0636343	0.322962	0.593943	0.719834	21.1005	25.6544	-1.65689	0.216538	Q2	1.33857	201
EH-44	1815	18.7691	0.611094	11.4697	0.0720064	0.303851	0.626821	0.858274	20.3349	26.22	-1.54396	-0.157947	Q3	1.49581	208
EH-45	1809	18.6056	0.571107	10.6258	0.0829243	0.326251	0.562246	0.976357	22.201	26.6245	-1.47844	0.389955	Q2	1.29157	214
EH-46	1802	17.9824	0.521168	9.37185	0.0638498	0.338287	0.623376	0.976249	23.0144	30.6292	-1.59298	0.0537022	Q2	1.3136	221
CH-1	2022	48.5833	1.69256	82.23	0.0669735	0.0952777	0.43804	0.500609	29.761	14.1083	1.40289	-1.37954	Q4	0.800522	1
CH-2	2020	38.7271	1.8877	73.1053	0.0691378	0.102385	0.448609	0.552758	27.6705	14.8285	1.77057	-0.933253	Q4	0.807421	3
CH-3	2018	22.4988	2.22006	49.9488	0.0860101	0.237707	0.398439	0.432421	27.2894	12.8607	1.50398	-0.927959	Q4	0.672753	5
CH-4	2016	21.3939	2.08738	44.6572	0.0841434	0.2303	0.425502	0.33299	25.0094	14.0397	1.50317	1.24725	Q1	0.427074	7
CH-5	2012	18.3465	2.15663	39.5667	0.0809122	0.246454	0.434923	0.427014	23.6793	14.8906	2.13518	0.946878	Q1	0.52233	11
CH-6	2010	19.4134	2.28155	44.2927	0.0975289	0.213631	0.379522	0.358964	27.8166	14.8898	2.99686	0.472442	Q1	0.639258	13
CH-7	2006	16.6895	2.39482	39.9684	0.0865623	0.255995	0.435657	0.277825	25.0046	15.5444	2.21458	1.33158	Q1	0.570379	17
CH-8	2002	16.0527	2.47573	39.7421	0.0725415	0.241863	0.364514	0.26204	25.5726	12.5923	1.37534	0.643763	Q1	0.691968	21
CH-9	1999	14.0059	3.1068	43.5135	0.0891364	0.25829	0.477505	0.410979	27.5646	12.0666	1.81315	-0.121105	Q4	0.702807	24
CH-10	1997	14.1355	2.9288	41.4001	0.0872417	0.233857	0.407933	0.230538	29.9371	10.8195	1.77618	-0.449193	Q4	0.836288	26
CH-11	1994	13.1611	2.68608	35.3518	0.0845467	0.263047	0.359114	0.421352	32.6884	11.999	1.1872	-0.554537	Q4	0.84367	29
CH-12	1993	12.0231	2.47573	29.7659	0.0797859	0.259415	0.442334	0.172937	30.8829	12.6535	1.51709	-0.709219	Q4	0.769938	30
CH-13	1991	11.7802	2.42718	28.5927	0.0750529	0.191925	0.452172	0.233032	32.4003	13.1114	0.927403	-0.642922	Q4	0.809441	32
CH-14	1989	11.0024	2.23301	24.5685	0.0826102	0.273596	0.526258	0.107506	34.1074	11.9957	0.738685	-0.450629	Q4	0.798381	34
CH-15	1988	10.7071	2.24919	24.0823	0.0948755	0.295743	0.463218	0.347976	34.9601	12.1257	1.49112	-0.638699	Q4	0.710268	35
CH-16	1986	10.4875	2.24919	23.5884	0.100827	0.266244	0.544047	0.251208	32.9654	12.19	1.41704	-0.783925	Q4	0.767647	37
CH-17	1985	10.4912	2.55663	26.8222	0.0962617	0.224521	0.479338	0.334815	31.065	13.9594	1.16982	-0.607104	Q4	0.759601	38
CH-18	1984	10.3222	2.94498	30.3987	0.086903	0.302307	0.538706	0.345218	27.0761	16.2535	0.90132	-0.645027	Q4	0.739441	39
CH-19	1983	9.7951	3.26861	32.0163	0.10007	0.250096	0.54692	0.384394	23.7514	17.4329	0.501603	-0.47688	Q4	0.767776	40
CH-20	1982	10.1299	3.1877	32.2911	0.0920713	0.227994	0.516779	0.614415	26.4083	18.9399	0.780278	-0.578725	Q4	0.805427	41
CH-21	1980	10.3489	3.34951	34.6638	0.0809384	0.271447	0.532088	0.418301	27.8306	16.8404	0.512469	-0.788408	Q4	0.862386	43
CH-22	1978	10.3715	3.23625	33.5647	0.0681609	0.284421	0.498924	0.470544	30.5822	9.69202	1.30315	-0.628691	Q4	0.787564	45
CH-23	1976	9.9104	3.1877	31.5914	0.0887157	0.283509	0.497177	0.305793	34.2835	7.986	1.27122	-1.59369	Q4	1.00132	47
CH-24	1975	9.827	3.1068	30.5305	0.107	0.241466	0.509041	0.480912	32.3827	9.95186	1.02028	-1.52403	Q4	0.935132	48
CH-25	1974	9.8727	3.17152	31.3115	0.102292	0.21036	0.496931	0.616815	34.5649	11.7213	-0.469565	-1.18153	Q3	1.04365	49
CH-26	1973	9.7302	3.22006	31.3319	0.119054	0.269596	0.51762	0.376252	34.8479	13.0315	0.467044	-0.122935	Q4	0.608634	50
CH-27	1971	9.5903	3.3657	32.278	0.110879	0.232871	0.566153	0.399737	32.7576	15.6537	0.973112	-0.569839	Q4	0.694682	52
CH-28	1970	10.1433	2.78317	28.2305	0.091364	0.250978	0.481762	0.506886	30.383	16.5706	0.836887	-0.275654	Q4	0.642366	53
CH-29	1969	11.9002	2.42718	28.884	0.0804064	0.274499	0.442887	0.465011	24.4827	13.7499	-0.0827572	0.512406	Q2	0.610533	54
CH-30	1967	12.6736	1.91392	24.2562	0.071236	0.279342	0.490752	0.543403	26.2024	10.3387	-0.081359	0.00768422	Q2	0.801849	56
CH-31	1965	9.6061	2.26537	21.7614	0.0859602	0.20823	0.535632	0.446613	23.8279	13.0265	0.765352	-0.215341	Q4	0.629362	58
CH-32	1963	9.5697	1.95793	18.7368	0.081321	0.192742	0.485085	0.569466	26.0096	11.6484	0.383868	-0.194374	Q4	0.605276	60
CH-33	1959	9.5873	1.77994	17.0648	0.10162	0.257528	0.533255	0.425617	19.5842	10.4668	-1.2596	-0.27384	Q3	0.638842	64
CH-34	1955	9.4484	1.66667	15.7473	0.108772	0.312541	0.523096	0.373276	26.766	9.67864	0.423014	-1.02755	Q4	0.772135	68
CH-35	1952	9.5512	1.56958	14.9914	0.0995158	0.307576	0.459086	0.58762	28.4728	10.3335	0.411778	-0.270317	Q4	0.666392	71
CH-36	1950	9.9104	1.58576	15.7155	0.086318	0.264953	0.492914	0.297374	25.6235	10.3325	0.822815	-0.329869	Q4	0.704475	73
CH-37	1947	9.883	1.55049	15.3234	0.0733332	0.232552	0.553902	0.482964	23.2487	9.74102	0.571239	-0.896311	Q4	0.849202	76
CH-38	1944	10.5012	1.41521	14.8614	0.0543965	0.271493	0.595837	0.218867	19.9247	11.1827	0.448047	-0.193753	Q4	0.763616	79
CH-39	1940	11.1723	1.34175	14.9904	0.0667097	0.322091	0.54725	0.305102	21.4414	12.2309	-0.319132	-0.714354	Q3	0.961499	83
CH-40	1935	12.0094	1.32557	15.9193	0.0784659	0.269053	0.524774	0.490673	19.1611	11.7052	-0.532403	-1.05381	Q3	1.20109	88
CH-41	1931	13.5728	1.24175	16.854	0.0748395	0.242739	0.48527	0.542263	22.8375	12.95	-1.03408	-0.852147	Q3	1.30305	92
CH-42	1925	14.4087	1.10939	15.9848	0.0523611	0.129279	0.50217	0.672955	24.5624	12.8832	-1.64692	-0.450888	Q3	1.15026	98
CH-43	1921	13.8474	1.23139	17.0516	0.0489065	0.162711	0.557817	0.490557	22.4334	14.3247	-1.10388	-0.532203	Q3	1.13707	102
CH-44	1916	14.0288	1.1534	16.1808	0.0381111	0.13949	0.552473	0.399014	26.9497	14.1272	-1.8777	-0.178237	Q3	1.05952	107
CH-45	1911	12.6791	1.15631	14.661	0.0534129	0.142049	0.541857	0.412019	26.6815	13.5356	0.00955566	1.06881	Q1	0.692014	112
CH-46	1905	11.7081	1.12704	13.1955	0.0664683	0.188508	0.534234	0.43421	24.952	14.9773	0.38389	-0.129951	Q4	0.876746	118
CH-47	1901	10.2843	1.16916	12.024	0.0921553	0.275176	0.520321	0.469446	22.6906	16.1562	0.197046	-0.719874	Q4	0.885155	122
CH-48	1894	9.2631	1.10906	10.2733	0.102239	0.241642	0.486082	0.524326	23.8841	12.7454	-0.343888	-0.987833	Q3	0.902661	129
CH-49	1890	8.7611	1.0101	8.8496	0.0941481	0.272415	0.449552	0.584398	26.5409	10.2526	-1.62081	-0.553116	Q3	0.739382	133
CH-50	1885	8.1226	0.970874	7.88602	0.0826444	0.273767	0.48583	0.604615	27.4681	9.79235	-0.439675	-1.28459	Q3	0.947846	138
CH-51	1881	8.1025	0.949995	7.69733	0.0923807	0.284111	0.492393	0.716352	23.6123	11.562	0.0847989	-1.08911	Q4	0.798606	142
CH-52	1876	8.1298	0.981661	7.98071	0.0781869	0.248642	0.46985	0.376156	22.8124	14.2496	-0.106651	-0.744888	Q3	0.718169	147
CH-53	1870	8.0128	1.01551	8.13709	0.0904493	0.283457	0.516879	0.521875	22.0125	10.6416	-0.226864	-1.03595	Q3	0.789641	153
CH-54	1864	8.9388	1.05178	9.40165	0.0850669	0.261111	0.511639	0.425671	22.9402	11.2306	-1.23752	-0.38047	Q3	0.708559	159
CH-55	1860	8.6392	1.17464	10.1479	0.093518	0.255739	0.459807	0.524865	24.799	12.9345	-1.52721	-0.507662	Q3	0.713002	163
CH-56	1855	9.4771	1.23226	11.6783	0.084623	0.259504	0.482054	0.639751	28.9171	14.0483	-0.309054	-1.00099	Q3	1.02387	168
CH-57	1850	9.9641	1.22977	12.2536	0.0918148	0.256246	0.464703	0.752954	24.5291	10.5062	-0.340758	-0.83114	Q3	0.913964	173
CH-58	1845	9.2877	1.10237	10.2385	0.0940241	0.239648	0.448506	0.622481	25.8558	11.0951	0.226382	-0.395177	Q4	0.763384	178
CH-59	1841	8.9444	1.20556	10.783	0.0856778	0.248881	0.409413	0.418646	24.7908	11.8153	0.161837	-0.462887	Q4	0.764651	182
CH-60	1835	9.7483	1.38276	13.4796	0.0664244	0.215562	0.424312	0.548526	27.9778	10.1092	-0.324464	-1.14936	Q3	1.09677	188
CH-61	1831	9.8628	1.44861	14.2873	0.0728811	0.19727	0.403992	0.497615	24.5202	8.40314	-0.700294	-1.06555	Q3	1.07632	192
CH-62	1824	9.2418	1.26958	11.7332	0.0861347	0.25108	0.386779	0.583626	28.9038	9.77933	-0.538564	-1.40334	Q3	1.16622	199
CH-63	1820	9.3459	1.37142	12.8171	0.0800902	0.243305	0.433349	0.627547	26.2439	11.3516	-0.417225	-1.48517	Q3	1.19897	203
CH-64	1815	9.1985	1.25556	11.5492	0.0839569	0.256759	0.431957	0.564367	25.0458	11.285	-0.688339	-1.19349	Q3	1.11435	208

## Sheet: Alkanes
Sample	nC15	nC16	nC17	nC18	nC19	nC20	nC21	nC22	nC23	nC24	nC25	nC26	nC27	nC28	nC29	nC30	nC31	nC32	nC33	Pr	Ph	Pr/Ph	Paq	CPI25-33	TAR	OEP
EH-1	0.20422	0.180573	0.859873	0.386943	1.20457	0.138318	0.504673	0.121986	0.862695	0.468085	1.36738	0.765957	4.83344	1.02996	5.84079	0.801498	4.68696	0.730337	2.67221	0.081813	0.36829	0.222143	0.1748	4.57896	5.81839	2.81603
EH-2	0.164809	0.0859873	0.527389	0.202548	1.22949	0.143302	0.413292	0.269504	1.21932	0.671395	2.50413	1.04965	3.57	1.48564	4.36736	1.39201	3.94079	0.967541	2.38594	0.0937644	0.45568	0.205768	0.309473	2.57323	5.56494	2.87822
EH-3	0.200722	0.109236	0.53949	0.185032	1.06334	0.0809969	0.421599	0.193853	1.07193	0.340426	1.91113	1.20095	4.41623	1.66042	5.12892	1.23596	3.82216	0.980025	1.61268	0.088803	0.343321	0.258659	0.24996	2.79251	5.85718	2.74998
EH-4	0.149476	0.0687898	0.364968	0.120382	0.934579	0.12648	0.380062	0.11253	1.1545	0.377305	1.43718	0.632151	2.86095	1.0181	4.05426	0.799625	3.21899	0.485019	1.52853	0.0217556	0.0791511	0.274862	0.262716	3.50735	6.07429	3.13004
EH-5	0.265085	0.181529	0.544586	0.281847	0.726895	0.193146	0.42783	0.193853	1.1528	0.548463	1.79012	1.01182	3.25489	1.31086	5.12114	1.15481	4.04352	0.36829	1.94076	0.0453567	0.187266	0.242205	0.243064	3.25084	7.22743	2.42719
EH-6	0.260324	0.151592	0.468153	0.19172	0.643821	0.094704	0.375909	0.139007	1.26668	0.348936	1.97373	0.669504	3.568	0.734082	5.86091	0.546816	4.47857	0.359551	1.8822	0.0225297	0.116604	0.193215	0.238619	5.95566	8.90599	4.09378
EH-7	0.371132	0.149045	0.484395	0.107643	0.731049	0.0851506	0.332295	0.113475	0.71988	0.293144	1.40154	1.20095	6.49518	0.992509	7.85338	0.699126	5.53381	0.530587	2.64786	0.0323325	0.174782	0.184988	0.13679	5.89484	10.1067	2.61435
EH-8	0.125628	0.124204	0.356688	0.121019	0.531672	0.141225	0.30945	0.184397	0.708445	0.420804	1.77618	0.884161	4.87727	1.13608	5.44276	0.586767	4.27161	0.343321	1.72755	0.0456444	0.205993	0.221583	0.203675	4.84808	11.2841	3.11173
EH-9	0.274897	0.124204	0.292994	0.0828025	1.11319	0.15784	0.303219	0.12766	0.916812	0.539007	2.41268	0.931442	5.74678	1.35456	6.51452	0.898876	5.06462	0.530587	2.54832	0.0377038	0.116604	0.323348	0.223326	4.65544	8.40381	3.59408
EH-10	0.214556	0.101911	0.33121	0.0955414	0.456906	0.130841	0.363448	0.156028	0.916424	0.439716	3.37611	1.03073	3.74539	1.22971	4.15894	0.667915	3.18388	0.299625	1.4403	0.0567856	0.106117	0.535121	0.368921	3.6798	8.75972	4.23654
EH-11	0.174934	0.143312	0.292994	0.0955414	0.606438	0.140187	0.380062	0.241135	1.93859	0.524823	5.06165	1.4539	5.83233	1.74157	6.48202	0.749064	5.07455	0.505618	2.69197	0.0501644	0.0686642	0.730576	0.377233	4.27453	13.2623	4.81887
EH-12	0.169078	0.140127	0.328025	0.127389	0.456906	0.110073	0.357217	0.12766	0.796824	0.468085	1.96272	0.91253	3.70453	0.892634	4.22389	0.605493	3.34495	0.349563	1.50652	0.0755273	0.0916355	0.824215	0.267181	4.02936	9.51286	2.94754
EH-13	0.147907	0.16879	0.315287	0.0955414	0.407061	0.164486	0.31568	0.192908	1.60253	0.385816	3.57256	0.839716	3.21546	0.71161	3.84437	0.494382	2.54454	0.2397	1.37029	0.0796907	0.0729089	1.09302	0.447518	4.52069	8.91601	5.3555
EH-14	0.168869	0.16879	0.324841	0.105096	0.42783	0.159917	0.357217	0.141844	1.16658	0.250591	1.91475	0.416076	1.99362	0.611735	2.54695	0.274657	2.02838	0.162297	0.67969	0.0582617	0.0686642	0.848502	0.402438	4.58574	5.70243	5.49325
EH-15	0.134037	0.184713	0.289809	0.10828	0.419522	0.342378	0.411215	0.204019	1.21434	0.412766	1.3805	0.658629	3.11105	0.843196	5.11863	0.630961	3.28593	0.162297	1.1906	0.0668635	0.0811486	0.823964	0.235908	4.72743	11.3772	2.94206
EH-16	0.117005	0.165605	0.264331	0.136943	0.294912	0.305296	0.338525	0.205674	2.07076	0.390071	1.93401	0.51773	1.72082	0.449438	2.49386	0.346442	1.28607	0.234082	0.851486	0.0507009	0.0791511	0.640558	0.514442	3.55745	6.84869	4.23982
EH-17	0.14098	0.171975	0.27707	0.133758	0.436137	0.233645	0.361371	0.156028	2.02769	0.312057	1.57494	0.468085	1.86114	0.702247	3.63106	0.402622	1.86105	0.477528	1.17605	0.0589161	0.0811486	0.726028	0.396123	3.69465	7.80644	4.27438
EH-18	0.199603	0.198726	0.397452	0.140764	0.286604	0.11838	0.332295	0.170213	2.34463	0.297872	1.76892	0.420804	2.1781	0.536829	2.96365	0.205993	1.49704	0.118602	0.816156	0.0882771	0.106117	0.831882	0.479757	5.01951	5.97158	5.26532
EH-19	0.163311	0.214013	0.340127	0.152866	0.224299	0.170301	0.313603	0.137116	1.62649	0.349882	1.41995	0.458629	1.67607	0.430712	3.24071	0.287141	1.45859	0.131086	1.02407	0.0618742	0.0978777	0.632159	0.393305	4.58378	7.86461	3.65556
EH-20	0.186668	0.191083	0.378344	0.129936	0.386293	0.313915	0.292835	0.213475	1.1986	0.331678	1.06255	0.587707	2.94621	0.562047	4.76713	0.299625	2.15694	0.262297	0.943206	0.0555885	0.0811486	0.685021	0.246173	5.32123	8.26998	2.86064
EH-21	0.170148	0.171975	0.334395	0.130573	0.328141	0.442991	0.357217	0.3513	1.57302	0.360047	1.70295	0.597163	2.39449	0.524594	3.52921	0.424719	1.82721	0.331086	1.18859	0.0671863	0.093633	0.717549	0.379497	4.11005	7.86015	3.70483
EH-22	0.159608	0.165605	0.289809	0.140127	0.344756	0.251298	0.382139	0.1513	1.70394	0.321513	2.05493	0.453901	2.46032	0.493134	3.16682	0.31211	1.52672	0.0893333	0.971364	0.0321673	0.0499376	0.644151	0.44471	5.18985	7.13308	5.31774
EH-23	0.227192	0.263057	0.401274	0.218471	0.373832	0.618899	0.431983	0.245863	1.96353	0.680851	3.53004	0.803783	3.82444	0.774032	3.42536	0.636704	1.85113	0.145818	1.23016	0.0728688	0.0998752	0.729599	0.510078	3.77518	6.49174	4.54122
EH-24	0.205077	0.348726	0.425159	0.253185	0.614746	1.6864	0.442368	0.434988	2.05648	1.68322	6.49076	1.24823	3.80516	2.09738	3.33994	0.848939	1.64637	0.391511	1.05085	0.0654244	0.0978777	0.66843	0.631559	2.00379	4.8492	3.82117
EH-25	0.0641322	0.640127	0.812102	0.611465	0.094704	1.19626	0.375909	0.184397	2.07201	0.879433	4.28132	0.751773	4.48345	1.44195	4.12167	0.749064	1.96974	0.486891	1.18903	0.0302236	0.0561798	0.537981	0.510523	3.08881	7.49836	4.94165
EH-26	0.0404815	0.203822	0.267516	0.191083	0.188162	0.88785	0.342679	0.283688	1.81983	1.11111	4.21279	1.25296	3.54438	1.02996	3.34866	0.702247	1.79794	0.296504	1.15054	0.0334223	0.0561798	0.594917	0.539628	2.58894	12.6918	3.24028
EH-27	0.138095	0.22293	0.292994	0.152866	0.431983	1.05919	0.375909	0.449173	2.23167	1.08747	4.00628	0.839243	4.08085	0.905119	4.29031	0.577403	2.31072	0.280899	1.24482	0.0434391	0.0873908	0.497068	0.48586	3.60622	9.09061	3.93808
EH-28	0.127843	0.181529	0.257962	0.159236	0.47352	0.88785	0.43406	0.756501	2.36211	1.01655	4.1141	0.862884	2.78431	0.889513	3.32862	0.561798	1.92492	0.421348	1.02251	0.0137315	0.031211	0.439959	0.552118	2.82673	7.30348	3.96809
EH-29	0.121956	0.175159	0.267516	0.121019	0.382139	0.711319	0.38837	0.957447	2.3782	0.886525	5.00533	0.6974	2.73087	1.23283	4.31732	0.780275	2.38592	0.31211	1.16154	0.0534201	0.0978777	0.545784	0.524146	3.20212	10.1927	5.54652
EH-30	0.114699	0.16242	0.27707	0.11465	0.265836	0.820353	0.409138	1.21749	2.93957	0.673759	3.95101	0.555556	2.73528	1.37328	5.24495	0.811486	3.45548	0.468165	1.4695	0.0704653	0.131086	0.53755	0.441959	3.64376	15.4651	5.97507
EH-31	0.10414	0.129936	0.259873	0.0968153	0.31568	0.477674	0.463136	0.576832	3.69438	0.93617	3.9796	0.756501	2.52326	0.836454	4.55683	0.499376	2.74477	0.411985	1.43601	0.0410388	0.0916355	0.447848	0.512433	3.6427	12.8552	4.44493
EH-32	0.122003	0.191083	0.318471	0.140127	0.245067	0.481828	0.419522	0.349882	4.47285	0.841608	3.81589	1.01182	2.89275	0.948814	4.972	0.586767	2.78879	0.424469	1.3593	0.0399767	0.0686642	0.582207	0.516447	3.4722	13.3035	4.08175
EH-33	0.126569	0.16879	0.299363	0.124204	0.419522	0.395639	0.375909	0.41844	2.68485	0.659574	3.1949	0.595745	3.07943	0.636704	4.98064	0.449438	2.49444	0.374532	1.03197	0.0660971	0.106117	0.622868	0.440271	4.6642	10.0621	4.9656
EH-34	0.119052	0.184713	0.261146	0.140127	0.299065	0.374455	0.43406	0.316785	2.18247	0.553191	3.21536	0.63357	3.61872	0.6804	5.96576	0.362047	2.66263	0.356055	1.48892	0.0319137	0.0499376	0.639071	0.384839	5.64711	14.8945	5.28611
EH-35	0.0898183	0.191083	0.273885	0.140127	0.228453	0.222222	0.382139	0.193853	1.69122	0.572104	3.14002	0.765957	3.05687	0.799001	4.51578	0.405743	1.7696	0.212235	0.825521	0.0541698	0.0978777	0.553444	0.434596	4.11065	12.0085	4.40716
EH-36	0.0846759	0.22293	0.254777	0.127389	0.299065	0.172378	0.411215	0.217494	2.20571	0.439716	3.37034	0.643026	2.87344	0.649189	4.4155	0.449438	1.63979	0.280899	1.11116	0.0498632	0.0811486	0.614469	0.479398	4.53626	11.2236	5.84192
EH-37	0.124578	0.187898	0.302548	0.146497	0.294912	0.209761	0.371755	0.288416	1.57058	0.520095	3.42138	0.609929	2.3347	0.636704	3.63168	0.505618	1.56971	0.287141	0.837965	0.0740695	0.11236	0.659219	0.489728	3.77644	8.36431	5.40555
EH-38	0.148604	0.187898	0.302548	0.121019	0.245067	0.178609	0.359294	0.132388	1.27847	0.453901	2.71998	0.78487	2.49574	0.76779	4.68882	0.387016	2.28474	0.174782	1.06183	0.0630736	0.11236	0.561355	0.364423	4.42313	11.5414	4.05525
EH-39	0.159852	0.165605	0.283439	0.117834	0.328141	0.184839	0.342679	0.198582	1.4661	0.397163	2.43188	0.728132	1.99215	0.636704	3.43544	0.343321	1.74699	0.230961	1.06633	0.0749657	0.11236	0.667194	0.429273	3.81961	8.1002	4.00995
EH-40	0.132578	0.181529	0.267516	0.127389	0.228453	0.180685	0.311526	0.184397	1.80643	0.330969	2.82935	0.628842	2.11702	0.586767	5.09648	0.449438	2.64485	0.249688	1.06143	0.0608634	0.0791511	0.768953	0.374545	5.25615	14.005	5.44366
EH-41	0.189919	0.171975	0.321656	0.124204	0.307373	0.182762	0.326064	0.165485	1.67184	0.420804	2.3355	0.515366	1.85706	0.71161	4.05605	0.374532	2.07701	0.287141	1.04037	0.092799	0.11236	0.825911	0.395186	4.19062	8.75931	4.68449
EH-42	0.183901	0.152866	0.289809	0.11465	0.23676	0.267913	0.307373	0.22695	2.16543	0.496454	2.92969	0.638298	2.78863	0.898876	6.66619	0.477528	3.28574	0.280899	2.14249	0.0415898	0.0561798	0.740298	0.338612	5.47147	17.0231	4.96412
EH-43	0.153616	0.143312	0.261146	0.127389	0.207684	0.218069	0.319834	0.312057	1.87286	0.48227	2.98861	0.780142	1.95498	0.82397	3.49945	0.655431	1.78007	0.252809	1.05163	0.0359468	0.0499376	0.719834	0.479388	3.09041	10.1714	4.30911
EH-44	0.151105	0.11465	0.235669	0.105096	0.178609	0.242991	0.296989	0.212766	2.47141	0.41844	2.27784	0.702128	1.39198	0.76779	3.37069	0.580524	1.71279	0.355805	0.857201	0.10715	0.124844	0.858274	0.483004	2.84739	10.5074	3.91106
EH-45	0.155217	0.149682	0.232484	0.140127	0.211838	0.271028	0.280374	0.248227	1.8298	0.446809	2.72505	0.64539	1.88967	0.683521	4.01844	0.496255	2.06122	0.280899	1.20301	0.0894689	0.0916355	0.976357	0.428309	3.89106	12.1471	4.5939
EH-46	0.0968071	0.133758	0.283439	0.101911	0.184839	0.205607	0.294912	0.319149	1.72273	0.553191	3.14268	0.617021	1.91303	0.861423	3.38676	0.365169	1.59951	0.477528	0.909974	0.0833651	0.0853933	0.976249	0.493866	3.10529	10.4342	4.80508
CH-1	0.056005	0.669022	1.29055	0.660211	0.531435	0.110842	5.2995	0.665114	1.68093	0.526892	0.337016	0.223686	1.82977	0.163974	2.46006	0.166013	1.67096	0.164252	1.23886	0.243433	0.486275	0.500609	0.328176	5.42147	2.85938	1.84285
CH-2	0.0690066	0.401644	1.32995	0.699745	0.48968	0.183725	5.11149	1.1875	2.88749	0.817861	0.611985	0.518442	1.99963	0.641736	2.85514	0.540863	2.31734	0.55475	1.62371	0.210987	0.381699	0.552758	0.403539	2.6971	3.59847	1.60125
CH-3	0.168525	0.460097	1.19091	0.646877	0.812337	0.171388	4.51504	0.989107	2.42693	0.701867	0.598367	0.575922	1.84502	0.487273	2.6593	0.512418	2.56957	0.292737	1.62371	0.1334	0.308497	0.432421	0.366518	3.18453	3.15529	1.53824
CH-4	0.192283	0.406379	1.29	0.563539	0.911032	0.390985	3.49181	2.1552	6.17212	1.65145	1.36892	1.22426	3.32126	1.74076	4.25656	1.72037	4.70007	1.73542	2.62737	0.104467	0.313725	0.33299	0.457097	1.76853	4.84015	1.53935
CH-5	0.405745	0.450321	1.46289	0.731978	1.07616	0.296085	2.32595	1.74129	4.49899	0.825725	1.27031	1.46018	3.05404	2.13396	3.97025	3.15095	5.07958	1.96601	2.74414	0.0803791	0.188235	0.427014	0.389314	1.47964	4.00503	1.65961
CH-6	0.173085	0.512348	1.62363	0.685771	0.301779	0.132859	1.52107	0.349684	3.12119	0.550484	0.743937	0.867012	3.07847	0.677856	4.30008	1.36245	4.63351	0.798201	2.42886	0.0450465	0.12549	0.358964	0.301993	3.19513	5.41457	1.88065
CH-7	0.136551	0.636704	1.50775	0.639662	0.345433	0.172716	2.03615	0.556641	5.21319	1.00267	1.09085	1.10097	3.39761	0.673778	5.26821	1.96601	4.84604	1.37621	2.62737	0.049391	0.177778	0.277825	0.383964	2.51175	6.40367	1.80116
CH-8	0.142425	0.43116	1.36009	0.619435	0.372005	0.217888	1.44918	0.719351	5.9762	1.01839	1.54548	1.29364	3.05404	1.73402	4.27565	2.17441	3.328	1.5964	2.16028	0.0561759	0.214379	0.26204	0.49729	1.60046	5.20875	1.97912
CH-9	0.182053	0.411919	1.5195	0.694595	0.409964	0.288493	1.80199	0.628005	4.34701	0.786405	2.27659	1.32116	2.4814	1.66718	3.70302	1.54135	2.74414	1.22679	1.98512	0.103148	0.25098	0.410979	0.50675	1.69029	3.99348	2.43028
CH-10	0.128065	0.260726	1.22296	0.599944	0.385291	0.280142	1.48173	0.834961	3.04149	0.707765	1.47958	1.30936	2.3287	2.44179	3.58849	1.91096	2.80253	1.06165	1.51804	0.0313412	0.135948	0.230538	0.414318	1.37502	4.55508	1.76584
CH-11	0.144404	0.373653	1.19585	0.580827	0.334045	0.222064	0.577922	0.567345	3.36012	0.746032	2.09133	1.29511	1.98512	1.48013	3.66484	1.06832	2.39382	0.901206	1.10933	0.0436958	0.103704	0.421352	0.473623	1.75642	4.28119	2.19157
CH-12	0.170176	0.222274	1.29775	0.73149	0.400474	0.224531	0.621212	0.389648	3.198	0.718976	1.85945	1.00346	1.90877	1.16381	3.39761	0.837943	2.33544	0.755183	1.34288	0.0219603	0.126984	0.172937	0.468695	2.06346	3.78717	2.36053
CH-13	0.140163	0.297528	1.10876	0.61794	0.360617	0.24427	0.532468	0.482422	3.15213	0.672423	1.91051	1.00863	1.79425	1.07588	3.09221	0.801735	2.5106	0.765528	1.22611	0.0229333	0.0984127	0.233032	0.474677	2.0733	4.24278	2.44035
CH-14	0.120846	0.448129	1.03303	0.711968	0.311269	0.175374	0.562771	0.569486	2.19852	0.662874	1.31264	0.997096	1.67972	1.06951	3.74119	0.841126	2.74414	0.774281	1.16772	0.0111488	0.103704	0.107506	0.351239	2.16467	5.22339	1.77022
CH-15	0.138332	0.127125	1.0703	0.522978	0.297983	0.153737	0.478355	0.37823	2.58059	0.465524	1.8076	0.68436	1.64154	0.791788	3.47396	0.592847	2.9193	0.517249	1.28449	0.0335088	0.0962963	0.347976	0.407013	3.13944	5.09602	3.27593
CH-16	0.145328	0.126658	0.956815	0.503736	0.341637	0.142349	0.37013	0.335412	2.1238	0.505312	1.53834	0.656508	1.45067	0.736085	3.74119	0.644571	2.62737	0.545101	1.16772	0.0212663	0.0846561	0.251208	0.365093	2.9707	5.21983	2.75527
CH-17	0.141298	0.164114	0.881032	0.465658	0.271412	0.132859	0.409091	0.363957	2.19612	0.529185	1.72795	0.700275	1.48884	0.779852	3.89389	0.680381	2.27705	0.557037	1.63481	0.0301156	0.0899471	0.334815	0.388713	2.8771	6.03347	2.85748
CH-18	0.16445	0.314714	1.06943	0.616352	0.233452	0.153737	0.335498	0.292593	3.15987	0.473481	2.18661	0.728127	1.71789	0.895238	3.39761	0.759958	2.39382	0.572952	1.16772	0.0325126	0.0941799	0.345218	0.480025	2.67847	4.74272	3.74444
CH-19	0.0933337	0.182328	0.673018	0.465129	0.27331	0.129063	0.270563	0.356821	1.96884	0.505312	1.96727	0.652529	1.98512	0.823619	3.20674	0.763937	2.5106	0.537143	1.40126	0.0305075	0.0793651	0.384394	0.407742	2.85959	6.84703	3.40237
CH-20	0.115048	0.295286	0.766984	0.464755	0.22586	0.140451	0.175325	0.29973	1.5005	0.497354	1.51802	0.676402	1.90877	0.85545	2.74863	0.728127	2.9193	0.584889	1.57642	0.0591659	0.0962963	0.614415	0.347498	2.7299	6.53886	2.6661
CH-21	0.0983142	0.177004	0.663777	0.312628	0.184104	0.129063	0.24026	0.249775	2.1896	0.453587	1.8814	0.660487	1.75607	0.807704	2.59593	0.632635	2.56898	0.58091	1.10933	0.0376249	0.0899471	0.418301	0.44078	2.68436	6.63102	3.41855
CH-22	0.113859	0.188137	0.731459	0.255857	0.218268	0.149941	0.287879	0.314002	0.954631	0.501333	1.09637	0.696296	1.73698	0.748021	3.57322	0.620698	2.73246	0.545101	1.51804	0.042324	0.0899471	0.470544	0.245432	3.00499	7.35598	1.93504
CH-23	0.1048	0.199253	0.787857	0.210368	0.218268	0.111981	0.235931	0.335412	0.660072	0.47746	0.943373	0.676402	1.10709	0.815661	2.06147	0.656508	2.33544	0.568974	0.934175	0.0287996	0.0941799	0.305793	0.267225	2.01651	4.79878	1.60925
CH-24	0.150704	0.237437	1.01105	0.53895	0.180308	0.100593	0.199134	0.27832	1.44234	0.453587	1.27522	0.620698	0.992561	0.803725	2.0233	0.592847	2.21867	0.537143	0.934175	0.0422388	0.0878307	0.480912	0.39048	2.10745	3.85685	2.34719
CH-25	0.101812	0.342113	0.719472	0.552874	0.17841	0.0948992	0.145022	0.271184	2.49268	0.437672	1.54226	0.608762	0.969041	0.724148	1.93808	0.541122	1.7887	0.509291	0.919901	0.0607024	0.0984127	0.616815	0.519851	2.101	4.6481	3.03777
CH-26	0.134455	0.172343	0.996659	0.611436	0.20688	0.0948992	0.168831	0.314002	2.95738	0.40982	1.46856	0.64855	1.43921	0.700275	3.42434	0.576931	2.80836	0.529185	1.89754	0.0306576	0.0814815	0.376252	0.415244	3.26553	6.07644	3.11988
CH-27	0.0999876	0.219535	0.796894	0.251434	0.220166	0.148043	0.218615	0.221229	1.62381	0.441651	1.29635	0.680381	1.68735	0.791788	3.47396	0.564995	2.73246	0.521228	1.21443	0.0325711	0.0814815	0.399737	0.319962	3.04968	6.64328	2.4708
CH-28	0.109029	0.155137	0.882217	0.272606	0.239146	0.172716	0.253247	0.335412	2.60324	0.485418	1.26572	0.656508	1.8706	0.903196	3.24491	0.608762	2.97768	0.553058	1.45965	0.0402291	0.0793651	0.506886	0.383386	2.94856	6.24374	2.64206
CH-29	0.119325	0.112194	0.903459	0.24039	0.246738	0.144247	0.300866	0.385367	5.21056	0.533164	1.95776	0.632635	2.06147	0.954921	3.51214	0.660487	3.15284	0.553058	1.63481	0.045271	0.0973545	0.465011	0.518193	3.15594	6.53773	4.07844
CH-30	0.102361	0.240354	0.775016	0.304364	0.20688	0.167023	0.238095	0.271184	3.54627	0.541122	1.7869	0.668444	1.79425	0.85545	3.20674	0.704254	2.56898	0.588868	1.75158	0.0563529	0.103704	0.543403	0.480081	2.78107	6.94236	3.31977
CH-31	0.0964865	0.368533	0.881687	0.261456	0.186002	0.148043	0.207792	0.342548	2.23197	0.497354	1.51828	0.736085	1.98512	0.795767	3.22582	0.752	2.96017	0.608762	1.66984	0.0415893	0.0931217	0.446613	0.377431	2.88061	6.74797	2.70115
CH-32	0.0936948	0.325571	0.902877	0.23986	0.239146	0.170819	0.235931	0.335412	3.0535	0.469503	1.10634	0.720169	2.13401	0.88728	2.72954	0.696296	2.65656	0.553058	1.66984	0.0476062	0.0835979	0.569466	0.43577	2.67811	5.71	2.48504
CH-33	0.0869717	0.197128	0.731667	0.228974	0.269514	0.159431	0.261905	0.242638	5.56869	0.441651	2.42571	0.644571	1.52765	0.799746	2.10962	0.64855	1.83575	0.553058	1.11258	0.040535	0.0952381	0.425617	0.669561	2.34558	4.6482	4.983
CH-34	0.112749	0.261015	0.85981	0.292896	0.248636	0.146145	0.287879	0.321139	2.56964	0.465524	1.62536	0.696296	1.52702	0.767915	2.25235	0.592847	1.98512	0.529185	1.05095	0.0363401	0.0973545	0.373276	0.497481	2.32739	4.33053	2.97998
CH-35	0.10211	0.303623	0.731331	0.228604	0.204982	0.161329	0.329004	0.371094	2.61133	0.493376	2.17776	0.744042	1.92998	0.779852	3.19825	0.600804	2.69106	0.505312	1.51804	0.0615602	0.104762	0.58762	0.448484	3.0951	7.13326	3.55739
CH-36	0.0834388	0.153796	0.645585	0.19637	0.170819	0.146145	0.300866	0.356821	1.67382	0.47746	2.1013	0.696296	2.15055	0.744042	3.63939	0.557037	2.82907	0.533164	1.17303	0.0270626	0.0910053	0.297374	0.368535	3.40963	8.49203	3.49991
CH-37	0.102742	0.239172	0.656065	0.196193	0.167023	0.129063	0.331169	0.29973	1.57627	0.493376	1.34916	0.660487	1.44218	0.712212	3.18129	0.461545	2.07005	0.505312	1.06156	0.0393526	0.0814815	0.482964	0.357773	2.78823	6.81864	2.40787
CH-38	0.107959	0.248599	0.569338	0.191777	0.165125	0.153737	0.311688	0.349684	1.48262	0.501333	1.51436	0.692317	2.04027	0.748021	3.69453	0.561016	2.55306	0.537143	1.58704	0.0201497	0.0920635	0.218867	0.324188	3.23655	9.30012	2.64086
CH-39	0.0947106	0.22011	0.540912	0.219955	0.139692	0.134757	0.270563	0.256911	2.12289	0.437672	1.93408	0.700275	1.36277	0.839534	2.64294	0.588868	2.06701	0.553058	1.08518	0.0261516	0.0857143	0.305102	0.462759	2.4307	7.47456	3.31521
CH-40	0.0891822	0.153948	0.465222	0.219846	0.17917	0.117675	0.205628	0.328275	2.08027	0.469503	1.90789	0.71619	1.17903	0.767915	2.07224	0.572952	1.92245	0.553058	0.715329	0.0353077	0.0719577	0.490673	0.499592	2.10589	6.42064	3.10086
CH-41	0.067615	0.229233	0.417912	0.172473	0.180688	0.148043	0.281385	0.306866	2.9478	0.497354	1.88352	0.664466	1.19385	0.728127	2.12654	0.596825	1.63396	0.537143	0.887005	0.0459058	0.0846561	0.542263	0.562317	2.09649	6.97598	3.32297
CH-42	0.0660244	0.153621	0.436593	0.172302	0.180688	0.127165	0.279221	0.271184	4.27106	0.469503	2.63776	0.668444	1.23432	0.803725	2.20682	0.588868	1.49775	0.553058	1.0297	0.0534091	0.0793651	0.672955	0.650953	2.19634	6.92849	4.68649
CH-43	0.0582646	0.149342	0.443682	0.173735	0.153737	0.108185	0.203463	0.342548	3.16637	0.509291	2.40065	0.664466	1.41855	0.759958	2.33374	0.568974	1.6033	0.529185	1.20248	0.0321847	0.0656085	0.490557	0.585752	2.36064	7.83843	4.04445
CH-44	0.0532492	0.181911	0.410802	0.198142	0.138932	0.1879	0.272727	0.43889	4.09951	0.793778	3.15394	1.00267	1.58676	1.08025	2.27293	0.883302	1.66359	0.811683	1.01962	0.0299788	0.0751323	0.399014	0.64821	1.66461	8.21936	3.42481
CH-45	0.0961216	0.157248	0.476116	0.222509	0.19739	0.151839	0.307359	0.349684	3.1809	0.596825	1.84198	0.692317	2.9692	0.783831	4.75072	0.564995	3.92778	0.505312	1.48619	0.0309559	0.0751323	0.412019	0.366596	4.235	13.2073	3.33593
CH-46	0.0736361	0.238861	0.475941	0.189683	0.160949	0.130961	0.350649	0.356821	1.39289	0.608762	1.33924	0.759958	2.35299	0.791788	3.70774	0.47746	2.39458	0.529185	1.69938	0.0321637	0.0740741	0.43421	0.309258	3.1494	10.9802	2.15188
CH-47	0.0392192	0.165101	0.524903	0.214076	0.0683274	0.10363	0.404762	0.19982	1.85429	0.392711	0.962722	0.481837	2.04885	0.534756	3.1272	0.376	1.81072	0.356504	0.934565	0.0432188	0.0920635	0.469446	0.363255	3.70501	9.2853	2.76699
CH-48	0.0475343	0.177221	0.46654	0.189738	0.128683	0.092242	0.493506	0.252629	2.19092	0.307962	0.882638	0.410616	1.5491	0.436876	2.51206	0.346159	1.45141	0.331835	0.861776	0.0499358	0.0952381	0.524326	0.43677	3.48239	7.50711	3.14366
CH-49	0.0296311	0.0836416	0.325145	0.0911202	0.158102	0.170819	0.508658	0.392503	4.81558	0.485418	1.43783	0.708233	1.48985	0.775873	2.17748	0.620698	1.3657	0.529185	0.744926	0.0476177	0.0814815	0.584398	0.638326	1.96332	8.36086	3.12747
CH-50	0.0276013	0.113762	0.325083	0.113699	0.14121	0.0787663	0.595238	0.164138	2.11086	0.260614	0.663513	0.336212	1.32889	0.364063	1.99334	0.292444	1.31261	0.266582	0.846843	0.0582222	0.0962963	0.604615	0.456288	3.54626	8.40826	3.10846
CH-51	0.0351832	0.164383	0.503975	0.183127	0.118624	0.0831317	0.608225	0.244065	2.00271	0.322286	0.847732	0.417778	1.53429	0.434489	2.78961	0.348546	1.46067	0.315124	0.856255	0.0750464	0.104762	0.716352	0.40143	3.61031	7.76326	2.91306
CH-52	0.0314414	0.151691	0.466125	0.176713	0.109134	0.153737	0.590909	0.428185	2.23142	0.545101	1.59633	0.696296	1.87813	0.759958	2.74497	0.584889	1.87813	0.497354	0.939067	0.0386107	0.102646	0.376156	0.452943	2.51944	9.1679	2.75648
CH-53	0.0475143	0.107551	0.428275	0.157741	0.162088	0.157533	0.595238	0.385367	2.32357	0.545101	1.13381	0.664466	1.62354	0.740063	2.55128	0.596825	1.50758	0.525206	0.703535	0.0497024	0.0952381	0.521875	0.459988	2.14902	7.466	2.22186
CH-54	0.0375669	0.164041	0.428181	0.176505	0.105338	0.167023	0.556277	0.385367	3.89214	0.505312	1.28686	0.64855	1.64327	0.708233	2.69313	0.553058	1.53295	0.537143	0.989003	0.0427923	0.100529	0.425671	0.550659	2.3735	9.13187	2.87221
CH-55	0.0355358	0.151359	0.390342	0.126087	0.113879	0.172716	0.504329	0.385367	4.38471	0.545101	2.03653	0.636614	1.36024	0.748021	2.50795	0.596825	1.3815	0.51327	0.782849	0.0560967	0.106878	0.524865	0.622775	2.19071	8.6563	3.80044
CH-56	0.0267978	0.126087	0.302188	0.163719	0.121471	0.0956584	0.4329	0.229793	1.55154	0.345363	0.819213	0.492978	1.47211	0.537541	2.81804	0.403852	1.86818	0.38157	0.501219	0.0629596	0.0984127	0.639751	0.335945	3.15483	11.516	2.36745
CH-57	0.0438309	0.138572	0.446738	0.182473	0.106287	0.134757	0.521645	0.363957	2.49137	0.517249	1.50075	0.672423	1.38299	0.736085	2.85967	0.568974	1.79578	0.545101	0.807253	0.0653357	0.0867725	0.752954	0.461646	2.36607	9.15247	2.70639
CH-58	0.0383254	0.138448	0.396341	0.176069	0.110083	0.111601	0.439394	0.25477	1.40592	0.37043	1.02508	0.498548	1.90141	0.565393	4.397	0.417778	2.19718	0.392711	0.659154	0.0625775	0.100529	0.622481	0.269357	4.15959	13.315	2.72095
CH-59	0.0326352	0.144633	0.35848	0.150829	0.12242	0.0797153	0.482684	0.201247	1.25141	0.310349	1.14292	0.446425	1.87912	0.503721	3.87213	0.374806	2.63204	0.329448	0.526408	0.0403141	0.0962963	0.418646	0.269071	4.69167	13.6906	3.29954
CH-60	0.0317327	0.119383	0.314362	0.138136	0.110083	0.155635	0.361472	0.27832	1.52615	0.469503	1.24229	0.78781	1.4089	0.81964	2.58298	0.620698	1.5557	0.58091	0.578866	0.0470165	0.0857143	0.548526	0.40081	1.96981	10.3415	2.06568
CH-61	0.0350611	0.175893	0.339405	0.16319	0.0986951	0.134757	0.339827	0.342548	2.04337	0.521228	1.22905	0.712212	1.34589	0.775873	2.36551	0.588868	1.50813	0.564995	0.60325	0.0400198	0.0804233	0.497615	0.457934	1.93972	9.46166	2.18162
CH-62	0.0209304	0.150622	0.34558	0.169396	0.0666192	0.117675	0.305195	0.306866	1.3755	0.489397	1.32065	0.696296	1.28139	0.823619	1.9648	0.600804	1.42149	0.561016	0.355373	0.0487899	0.0835979	0.583626	0.443267	1.73619	8.63868	2.23093
CH-63	0.0345982	0.0813459	0.320298	0.131546	0.0977461	0.0683274	0.378788	0.153433	1.63	0.262603	0.896687	0.356106	1.09201	0.391915	1.98179	0.312339	1.30861	0.286476	0.523444	0.0478131	0.0761905	0.627547	0.434356	3.16413	8.42573	3.2738
CH-64	0.0297389	0.125257	0.257332	0.156662	0.106287	0.148043	0.344156	0.356821	1.38835	0.44563	1.49365	0.624677	1.20323	0.728127	2.26582	0.656508	1.4419	0.533164	0.659154	0.0406105	0.0719577	0.564367	0.437348	2.00373	11.1015	2.69864

## Sheet: Isotope
	nC23								nC23								nC25								nC25
Sample	Fossil		Terrestrial		Aquatic		nC23		Fossil		Terrestrial		Aquatic		nC23		Fossil		Terrestrial		Aquatic		nC25		Fossil		Terrestrial		Aquatic		nC25
EH-1	-120.497	20	-166.968	20	-249.686	20	-169.055		-29.7067	2	-31.4286	2	-22.73	2	-29.0203		-120.497	20	-171.383	20	-249.686	20	-178.523		-29.7067	2	-31.6714	2	-22.73	2	-31.4286
EH-2	-120.497	20	-184.436	20	-238.022	20	-156.536		-29.7067	2	-31.8095	2	-22.73	2	-28.6892		-120.497	20	-188.758	20	-238.022	20	-153.461		-29.7067	2	-32.0523	2	-22.73	2	-31.7619
EH-3	-120.497	20	-173.355	20	-241.508	20	-155.135		-29.7067	2	-31.0476	2	-22.73	2	-28.027		-120.497	20	-177.736	20	-241.508	20	-149.954		-29.7067	2	-31.2906	2	-22.73	2	-31.3809
EH-4	-120.497	20	-161.106	20	-229.263	20	-151.555		-29.7067	2	-31.1429	2	-22.73	2	-27.9324		-120.497	20	-165.552	20	-229.263	20	-162.176		-29.7067	2	-31.3858	2	-22.73	2	-31.4762
EH-5	-120.497	20	-162.26	20	-229.834	20	-145.287		-29.7067	2	-31.5238	2	-22.73	2	-27.3649		-120.497	20	-166.7	20	-229.834	20	-154.009		-29.7067	2	-31.7666	2	-22.73	2	-30.7619
EH-6	-120.497	20	-187.882	20	-251.373	20	-176.952		-29.7067	2	-31.6667	2	-22.73	2	-27.1554		-120.497	20	-192.186	20	-251.373	20	-178.558		-29.7067	2	-31.9095	2	-22.73	2	-29.5952
EH-7	-120.497	20	-166.314	20	-240.294	20	-201.177		-29.7067	2	-30.9048	2	-22.73	2	-27.8176		-120.497	20	-170.733	20	-240.294	20	-191.946		-29.7067	2	-31.1478	2	-22.73	2	-29.6429
EH-8	-120.497	20	-168.633	20	-241.448	20	-183.095		-29.7067	2	-31.1429	2	-22.73	2	-27.9122		-120.497	20	-173.04	20	-241.448	20	-188.439		-29.7067	2	-31.3858	2	-22.73	2	-29.1667
EH-9	-120.497	20	-176.776	20	-245.514	20	-173.352		-29.7067	2	-31	2	-22.73	2	-28.2432		-120.497	20	-181.139	20	-245.514	20	-196.002		-29.7067	2	-31.243	2	-22.73	2	-28.4524
EH-10	-120.497	20	-173.851	20	-259.482	20	-183.258		-29.7067	2	-31.1429	2	-22.73	2	-27.5135		-120.497	20	-178.23	20	-259.482	20	-190.747		-29.7067	2	-31.3858	2	-22.73	2	-27.1905
EH-11	-120.497	20	-180.83	20	-258.305	20	-202.007		-29.7067	2	-30.4762	2	-22.73	2	-27.1824		-120.497	20	-185.171	20	-258.305	20	-193.647		-29.7067	2	-30.7193	2	-22.73	2	-27.4286
EH-12	-120.497	20	-186.643	20	-246.064	20	-211.722		-29.7067	2	-30.7619	2	-22.73	2	-27.2297		-120.497	20	-190.954	20	-246.064	20	-197.714		-29.7067	2	-31.0049	2	-22.73	2	-27.3333
EH-13	-120.497	20	-187.214	20	-251.295	20	-181.046		-29.7067	2	-30.9524	2	-22.73	2	-26.3311		-120.497	20	-191.522	20	-251.295	20	-194.206		-29.7067	2	-31.1954	2	-22.73	2	-26.3809
EH-14	-120.497	20	-185.457	20	-257.687	20	-169.914		-29.7067	2	-30.2381	2	-22.73	2	-25.527		-120.497	20	-189.774	20	-257.687	20	-208.76		-29.7067	2	-30.4813	2	-22.73	2	-25.4762
EH-15	-120.497	20	-191.269	20	-254.181	20	-182.681		-29.7067	2	-30.6191	2	-22.73	2	-25.0811		-120.497	20	-195.555	20	-254.181	20	-204.667		-29.7067	2	-30.8621	2	-22.73	2	-25.9048
EH-16	-120.497	20	-209.897	20	-256.501	20	-199.262		-29.7067	2	-30.6667	2	-22.73	2	-23.8446		-120.497	20	-214.085	20	-256.501	20	-188.344		-29.7067	2	-30.9097	2	-22.73	2	-25.7619
EH-17	-120.497	20	-205.81	20	-254.74	20	-185.654		-29.7067	2	-31.0952	2	-22.73	2	-23.5608		-120.497	20	-210.019	20	-254.74	20	-186.002		-29.7067	2	-31.3382	2	-22.73	2	-26.0476
EH-18	-120.497	20	-212.788	20	-244.245	20	-192.898		-29.7067	2	-31.1905	2	-22.73	2	-23.6081		-120.497	20	-216.96	20	-244.245	20	-182.495		-29.7067	2	-31.4334	2	-22.73	2	-26.7143
EH-19	-120.497	20	-204.618	20	-244.231	20	-198.75		-29.7067	2	-31	2	-22.73	2	-24.3176		-120.497	20	-208.833	20	-244.231	20	-198.792		-29.7067	2	-31.243	2	-22.73	2	-26.0952
EH-20	-120.497	20	-195.288	20	-237.234	20	-195.568		-29.7067	2	-30.5714	2	-22.73	2	-25.4527		-120.497	20	-199.553	20	-237.234	20	-209.27		-29.7067	2	-30.8145	2	-22.73	2	-27.3333
EH-21	-120.497	20	-192.364	20	-243.627	20	-230.456		-29.7067	2	-30.5714	2	-22.73	2	-24.9595		-120.497	20	-196.644	20	-243.627	20	-208.094		-29.7067	2	-30.8145	2	-22.73	2	-27.2381
EH-22	-120.497	20	-197.016	20	-249.437	20	-238.387		-29.7067	2	-30.2381	2	-22.73	2	-25.2432		-120.497	20	-201.272	20	-249.437	20	-212.742		-29.7067	2	-30.4813	2	-22.73	2	-27.7619
EH-23	-120.497	20	-209.234	20	-245.349	20	-227.559		-29.7067	2	-30.1429	2	-22.73	2	-24.9122		-120.497	20	-213.425	20	-245.349	20	-204.574		-29.7067	2	-30.3861	2	-22.73	2	-26.3809
EH-24	-120.497	20	-217.961	20	-244.754	20	-220.903		-29.7067	2	-29.8571	2	-22.73	2	-25.3108		-120.497	20	-222.106	20	-244.754	20	-185.341		-29.7067	2	-30.1004	2	-22.73	2	-26.0476
EH-25	-120.497	20	-198.143	20	-254.649	20	-202.42		-29.7067	2	-29.6191	2	-22.73	2	-26.0676		-120.497	20	-202.393	20	-254.649	20	-200.473		-29.7067	2	-29.8624	2	-22.73	2	-26.7143
EH-26	-120.497	20	-198.714	20	-247.062	20	-200.067		-29.7067	2	-29.8095	2	-22.73	2	-26.1622		-120.497	20	-202.961	20	-247.062	20	-195.217		-29.7067	2	-30.0528	2	-22.73	2	-27.2857
EH-27	-120.497	20	-200.45	20	-244.139	20	-235.512		-29.7067	2	-29.0476	2	-22.73	2	-25.5946		-120.497	20	-204.688	20	-244.139	20	-219.092		-29.7067	2	-29.2911	2	-22.73	2	-26.7619
EH-28	-120.497	20	-199.854	20	-240.05	20	-247.308		-29.7067	2	-29.3809	2	-22.73	2	-26.0203		-120.497	20	-204.095	20	-240.05	20	-219.079		-29.7067	2	-29.6243	2	-22.73	2	-27
EH-29	-120.497	20	-207.415	20	-242.949	20	-232		-29.7067	2	-29.0952	2	-22.73	2	-25.6892		-120.497	20	-211.615	20	-242.949	20	-224.311		-29.7067	2	-29.3387	2	-22.73	2	-25.8571
EH-30	-120.497	20	-216.721	20	-251.095	20	-228.506		-29.7067	2	-29.0476	2	-22.73	2	-25.5946		-120.497	20	-220.873	20	-251.095	20	-230.704		-29.7067	2	-29.2911	2	-22.73	2	-26.2857
EH-31	-120.497	20	-209.14	20	-244.675	20	-233.355		-29.7067	2	-29.2857	2	-22.73	2	-24.7162		-120.497	20	-213.332	20	-244.675	20	-222.54		-29.7067	2	-29.5291	2	-22.73	2	-26.3809
EH-32	-120.497	20	-200.392	20	-250.488	20	-239.595		-29.7067	2	-29.3333	2	-22.73	2	-24.2432		-120.497	20	-204.63	20	-250.488	20	-223.108		-29.7067	2	-29.5767	2	-22.73	2	-26.2857
EH-33	-120.497	20	-205.623	20	-257.468	20	-240.274		-29.7067	2	-28.4762	2	-22.73	2	-24.8581		-120.497	20	-209.833	20	-257.468	20	-237.662		-29.7067	2	-28.7198	2	-22.73	2	-26.2857
EH-34	-120.497	20	-209.69	20	-255.705	20	-250.953		-29.7067	2	-28.6191	2	-22.73	2	-25.3784		-120.497	20	-213.878	20	-255.705	20	-239.401		-29.7067	2	-28.8626	2	-22.73	2	-26.2381
EH-35	-120.497	20	-224.823	20	-260.356	20	-247.458		-29.7067	2	-29.0476	2	-22.73	2	-25.7568		-120.497	20	-228.932	20	-260.356	20	-231.812		-29.7067	2	-29.2911	2	-22.73	2	-25.4762
EH-36	-120.497	20	-223.646	20	-264.421	20	-234.225		-29.7067	2	-29.7619	2	-22.73	2	-25.3311		-120.497	20	-227.76	20	-264.421	20	-241.707		-29.7067	2	-30.0052	2	-22.73	2	-25
EH-37	-120.497	20	-211.987	20	-255.673	20	-239.774		-29.7067	2	-29.7619	2	-22.73	2	-26.0405		-120.497	20	-216.163	20	-255.673	20	-236.451		-29.7067	2	-30.0052	2	-22.73	2	-25.2381
EH-38	-120.497	20	-207.312	20	-261.487	20	-257.841		-29.7067	2	-29.6191	2	-22.73	2	-26.6554		-120.497	20	-211.513	20	-261.487	20	-233.526		-29.7067	2	-29.8624	2	-22.73	2	-25.4762
EH-39	-120.497	20	-201.473	20	-263.223	20	-250.876		-29.7067	2	-29.0476	2	-22.73	2	-25.5135		-120.497	20	-205.705	20	-263.223	20	-232.93		-29.7067	2	-29.2911	2	-22.73	2	-25.7143
EH-40	-120.497	20	-195.638	20	-263.212	20	-245.307		-29.7067	2	-28.7143	2	-22.73	2	-25.3243		-120.497	20	-199.901	20	-263.212	20	-238.163		-29.7067	2	-28.9578	2	-22.73	2	-25.8095
EH-41	-120.497	20	-202.615	20	-262.616	20	-245.286		-29.7067	2	-29.0952	2	-22.73	2	-25.2297		-120.497	20	-206.841	20	-262.616	20	-235.238		-29.7067	2	-29.3387	2	-22.73	2	-25.6191
EH-42	-120.497	20	-203.765	20	-263.185	20	-265.423		-29.7067	2	-29.5238	2	-22.73	2	-24.6622		-120.497	20	-207.986	20	-263.185	20	-241.057		-29.7067	2	-29.7672	2	-22.73	2	-25.1429
EH-43	-120.497	20	-192.107	20	-256.768	20	-254.287		-29.7067	2	-28.9524	2	-22.73	2	-24.4257		-120.497	20	-196.389	20	-256.768	20	-232.885		-29.7067	2	-29.1959	2	-22.73	2	-24.3809
EH-44	-120.497	20	-185.105	20	-268.406	20	-250.098		-29.7067	2	-28.5714	2	-22.73	2	-24.0946		-120.497	20	-189.423	20	-268.406	20	-221.222		-29.7067	2	-28.815	2	-22.73	2	-25.2857
EH-45	-120.497	20	-178.102	20	-254.999	20	-246.607		-29.7067	2	-28.2857	2	-22.73	2	-24.473		-120.497	20	-182.458	20	-254.999	20	-228.2		-29.7067	2	-28.5294	2	-22.73	2	-24.5238
EH-46	-120.497	20	-176.921	20	-245.666	20	-227.118		-29.7067	2	-28.9524	2	-22.73	2	-24.8041		-120.497	20	-181.283	20	-245.666	20	-229.353		-29.7067	2	-29.1959	2	-22.73	2	-24.5714
	Fossil		Terrestrial		Aquatic		nC23		Fossil		Terrestrial		Aquatic		nC23		Fossil		Terrestrial		Aquatic		nC25		Fossil		Terrestrial		Aquatic		nC25
CH-1	-120.497	20	-186.877	20	-203.912	20	-144.29		-29.7067	2	-33.482	2	-21.86	2	-28.434		-120.497	20	-191.187	20	-203.912	20	-165.714		-29.7067	2	-33.482	2	-21.86	2	-28.434
CH-2	-120.497	20	-181.199	20	-184.038	20	-138.612		-29.7067	2	-31.4698	2	-21.86	2	-28.7421		-120.497	20	-185.538	20	-184.038	20	-156.571		-29.7067	2	-31.4698	2	-21.86	2	-28.7421
CH-3	-120.497	20	-205.615	20	-191.987	20	-122.145		-29.7067	2	-31.8722	2	-21.86	2	-29.0063		-120.497	20	-209.825	20	-191.987	20	-169.143		-29.7067	2	-31.8722	2	-21.86	2	-29.0063
CH-4	-120.497	20	-200.505	20	-193.123	20	-134.069		-29.7067	2	-31.6039	2	-21.86	2	-28.522		-120.497	20	-204.742	20	-193.123	20	-173.714		-29.7067	2	-31.6039	2	-21.86	2	-28.522
CH-5	-120.497	20	-205.047	20	-190.284	20	-145.426		-29.7067	2	-31.7381	2	-21.86	2	-27.8616		-120.497	20	-209.261	20	-190.284	20	-176		-29.7067	2	-31.7381	2	-21.86	2	-27.8616
CH-6	-120.497	20	-198.801	20	-191.987	20	-149.968		-29.7067	2	-30.9332	2	-21.86	2	-28.1258		-120.497	20	-203.048	20	-191.987	20	-173.714		-29.7067	2	-30.9332	2	-21.86	2	-28.1258
CH-7	-120.497	20	-201.64	20	-181.199	20	-140.883		-29.7067	2	-31.425	2	-21.86	2	-27.8176		-120.497	20	-205.872	20	-181.199	20	-164		-29.7067	2	-31.425	2	-21.86	2	-27.8176
CH-8	-120.497	20	-211.861	20	-187.445	20	-145.426		-29.7067	2	-30.486	2	-21.86	2	-27.5535		-120.497	20	-216.038	20	-187.445	20	-156.571		-29.7067	2	-30.486	2	-21.86	2	-27.5535
CH-9	-120.497	20	-202.208	20	-182.334	20	-149.401		-29.7067	2	-29.9494	2	-21.86	2	-26.9811		-120.497	20	-206.436	20	-182.334	20	-157.143		-29.7067	2	-29.9494	2	-21.86	2	-26.9811
CH-10	-120.497	20	-216.404	20	-184.606	20	-149.968		-29.7067	2	-31.3356	2	-21.86	2	-28.478		-120.497	20	-220.557	20	-184.606	20	-145.143		-29.7067	2	-31.3356	2	-21.86	2	-28.478
CH-11	-120.497	20	-222.082	20	-189.148	20	-147.129		-29.7067	2	-30.9779	2	-21.86	2	-27.9057		-120.497	20	-226.205	20	-189.148	20	-160		-29.7067	2	-30.9779	2	-21.86	2	-27.9057
CH-12	-120.497	20	-226.057	20	-191.987	20	-148.265		-29.7067	2	-30.3518	2	-21.86	2	-27.9497		-120.497	20	-230.159	20	-191.987	20	-170.286		-29.7067	2	-30.3518	2	-21.86	2	-27.9497
CH-13	-120.497	20	-210.726	20	-186.877	20	-142.019		-29.7067	2	-30.486	2	-21.86	2	-27.4214		-120.497	20	-214.909	20	-186.877	20	-165.714		-29.7067	2	-30.486	2	-21.86	2	-27.4214
CH-14	-120.497	20	-203.912	20	-178.36	20	-143.155		-29.7067	2	-30.6649	2	-21.86	2	-26.9371		-120.497	20	-208.131	20	-178.36	20	-159.429		-29.7067	2	-30.6649	2	-21.86	2	-26.9371
CH-15	-120.497	20	-193.123	20	-187.445	20	-139.748		-29.7067	2	-30.8884	2	-21.86	2	-26.9811		-120.497	20	-197.399	20	-187.445	20	-159.429		-29.7067	2	-30.8884	2	-21.86	2	-26.9811
CH-16	-120.497	20	-185.173	20	-194.827	20	-135.773		-29.7067	2	-31.1567	2	-21.86	2	-28.566		-120.497	20	-189.492	20	-194.827	20	-155.429		-29.7067	2	-31.1567	2	-21.86	2	-28.566
CH-17	-120.497	20	-194.827	20	-187.445	20	-140.315		-29.7067	2	-31.6039	2	-21.86	2	-29.3585		-120.497	20	-199.094	20	-187.445	20	-150.857		-29.7067	2	-31.6039	2	-21.86	2	-29.3585
CH-18	-120.497	20	-198.233	20	-177.792	20	-148.833		-29.7067	2	-32.0064	2	-21.86	2	-29.5346		-120.497	20	-202.483	20	-177.792	20	-156		-29.7067	2	-32.0064	2	-21.86	2	-29.5346
CH-19	-120.497	20	-200.505	20	-160.757	20	-145.426		-29.7067	2	-32.0511	2	-21.86	2	-29.6226		-120.497	20	-204.742	20	-160.757	20	-166.857		-29.7067	2	-32.0511	2	-21.86	2	-29.6226
CH-20	-120.497	20	-201.073	20	-146.562	20	-160.757		-29.7067	2	-32.3194	2	-21.86	2	-29.8868		-120.497	20	-205.307	20	-146.562	20	-159.286		-29.7067	2	-32.3194	2	-21.86	2	-29.8868
CH-21	-120.497	20	-194.827	20	-149.968	20	-156.782		-29.7067	2	-31.8722	2	-21.86	2	-28.3899		-120.497	20	-199.094	20	-149.968	20	-147.286		-29.7067	2	-31.8722	2	-21.86	2	-28.3899
CH-22	-120.497	20	-191.42	20	-156.782	20	-176.088		-29.7067	2	-31.2462	2	-21.86	2	-27.8176		-120.497	20	-195.705	20	-156.782	20	-151.857		-29.7067	2	-31.2462	2	-21.86	2	-27.8176
CH-23	-120.497	20	-202.776	20	-151.672	20	-176.088		-29.7067	2	-31.0673	2	-21.86	2	-28.1698		-120.497	20	-207.001	20	-151.672	20	-159.857		-29.7067	2	-31.0673	2	-21.86	2	-28.1698
CH-24	-120.497	20	-195.962	20	-146.562	20	-185.741		-29.7067	2	-31.0673	2	-21.86	2	-28.0818		-120.497	20	-200.224	20	-146.562	20	-147.286		-29.7067	2	-31.0673	2	-21.86	2	-28.0818
CH-25	-120.497	20	-199.937	20	-151.672	20	-194.259		-29.7067	2	-30.8884	2	-21.86	2	-28.3459		-120.497	20	-204.177	20	-151.672	20	-147.286		-29.7067	2	-30.8884	2	-21.86	2	-28.3459
CH-26	-120.497	20	-209.59	20	-155.079	20	-190.852		-29.7067	2	-30.7096	2	-21.86	2	-26.8616		-120.497	20	-213.779	20	-155.079	20	-148.429		-29.7067	2	-30.7096	2	-21.86	2	-26.8616
CH-27	-120.497	20	-207.886	20	-161.325	20	-189.148		-29.7067	2	-29.9047	2	-21.86	2	-26.1132		-120.497	20	-212.085	20	-161.325	20	-178.571		-29.7067	2	-29.9047	2	-21.86	2	-26.1132
CH-28	-120.497	20	-195.394	20	-164.164	20	-188.58		-29.7067	2	-29.2786	2	-21.86	2	-27.1698		-120.497	20	-199.659	20	-164.164	20	-174		-29.7067	2	-29.2786	2	-21.86	2	-27.1698
CH-29	-120.497	20	-194.259	20	-167.003	20	-188.58		-29.7067	2	-29.6364	2	-21.86	2	-27.1698		-120.497	20	-198.529	20	-167.003	20	-188.857		-29.7067	2	-29.6364	2	-21.86	2	-27.1698
CH-30	-120.497	20	-194.827	20	-165.3	20	-200.505		-29.7067	2	-30.3965	2	-21.86	2	-26.8176		-120.497	20	-199.094	20	-165.3	20	-191.714		-29.7067	2	-30.3965	2	-21.86	2	-26.8176
CH-31	-120.497	20	-191.42	20	-163.028	20	-198.233		-29.7067	2	-29.9047	2	-21.86	2	-26.3333		-120.497	20	-195.705	20	-163.028	20	-182.429		-29.7067	2	-29.9047	2	-21.86	2	-26.3333
CH-32	-120.497	20	-197.666	20	-157.918	20	-188.013		-29.7067	2	-29.4575	2	-21.86	2	-26.8616		-120.497	20	-201.918	20	-157.918	20	-184.143		-29.7067	2	-29.4575	2	-21.86	2	-26.8616
CH-33	-120.497	20	-202.776	20	-167.003	20	-205.615		-29.7067	2	-29.5469	2	-21.86	2	-27.3019		-120.497	20	-207.001	20	-167.003	20	-193.286		-29.7067	2	-29.5469	2	-21.86	2	-27.3019
CH-34	-120.497	20	-207.886	20	-180.631	20	-211.293		-29.7067	2	-29.9941	2	-21.86	2	-27.434		-120.497	20	-212.085	20	-180.631	20	-172.714		-29.7067	2	-29.9941	2	-21.86	2	-27.434
CH-35	-120.497	20	-196.53	20	-172.114	20	-220.946		-29.7067	2	-29.5022	2	-21.86	2	-27.434		-120.497	20	-200.788	20	-172.114	20	-172.143		-29.7067	2	-29.5022	2	-21.86	2	-27.434
CH-36	-120.497	20	-193.691	20	-162.461	20	-211.861		-29.7067	2	-28.8314	2	-21.86	2	-26.4654		-120.497	20	-197.964	20	-162.461	20	-205.714		-29.7067	2	-28.8314	2	-21.86	2	-26.4654
CH-37	-120.497	20	-201.64	20	-164.164	20	-203.912		-29.7067	2	-29.5022	2	-21.86	2	-28.2264		-120.497	20	-205.872	20	-164.164	20	-190.857		-29.7067	2	-29.5022	2	-21.86	2	-28.2264
CH-38	-120.497	20	-209.59	20	-167.571	20	-190.284		-29.7067	2	-29.9047	2	-21.86	2	-28.0943		-120.497	20	-213.779	20	-167.571	20	-180		-29.7067	2	-29.9047	2	-21.86	2	-28.0943
CH-39	-120.497	20	-207.886	20	-164.732	20	-197.098		-29.7067	2	-29.9047	2	-21.86	2	-28.1384		-120.497	20	-212.085	20	-164.732	20	-176		-29.7067	2	-29.9047	2	-21.86	2	-28.1384
CH-40	-120.497	20	-200.505	20	-165.3	20	-181.767		-29.7067	2	-30.173	2	-21.86	2	-27.9623		-120.497	20	-204.742	20	-165.3	20	-183.857		-29.7067	2	-30.173	2	-21.86	2	-27.9623
CH-41	-120.497	20	-197.666	20	-166.435	20	-195.394		-29.7067	2	-30.3071	2	-21.86	2	-26.9497		-120.497	20	-201.918	20	-166.435	20	-185		-29.7067	2	-30.3071	2	-21.86	2	-26.9497
CH-42	-120.497	20	-195.394	20	-165.3	20	-203.344		-29.7067	2	-30.1282	2	-21.86	2	-25.8491		-120.497	20	-199.659	20	-165.3	20	-182.714		-29.7067	2	-30.1282	2	-21.86	2	-25.8491
CH-43	-120.497	20	-188.013	20	-159.621	20	-206.183		-29.7067	2	-30.3518	2	-21.86	2	-25.1006		-120.497	20	-192.316	20	-159.621	20	-179.286		-29.7067	2	-30.3518	2	-21.86	2	-25.1006
CH-44	-120.497	20	-181.767	20	-151.104	20	-200.505		-29.7067	2	-30.3071	2	-21.86	2	-25.1446		-120.497	20	-186.103	20	-151.104	20	-189.571		-29.7067	2	-30.3071	2	-21.86	2	-25.1446
CH-45	-120.497	20	-180.063	20	-143.155	20	-207.319		-29.7067	2	-29.6364	2	-21.86	2	-26.2013		-120.497	20	-184.409	20	-143.155	20	-193.571		-29.7067	2	-29.6364	2	-21.86	2	-26.2013
CH-46	-120.497	20	-167.571	20	-140.315	20	-212.429		-29.7067	2	-29.2786	2	-21.86	2	-26.1698		-120.497	20	-171.983	20	-140.315	20	-191.286		-29.7067	2	-29.2786	2	-21.86	2	-26.1698
CH-47	-120.497	20	-169.842	20	-155.079	20	-201.073		-29.7067	2	-29.1892	2	-21.86	2	-26.6981		-120.497	20	-174.242	20	-155.079	20	-191.857		-29.7067	2	-29.1892	2	-21.86	2	-26.6981
CH-48	-120.497	20	-180.063	20	-160.757	20	-194.827		-29.7067	2	-29.2786	2	-21.86	2	-26.7421		-120.497	20	-184.409	20	-160.757	20	-191.286		-29.7067	2	-29.2786	2	-21.86	2	-26.7421
CH-49	-120.497	20	-190.284	20	-167.003	20	-185.173		-29.7067	2	-29.9047	2	-21.86	2	-26.7421		-120.497	20	-194.575	20	-167.003	20	-186		-29.7067	2	-29.9047	2	-21.86	2	-26.7421
CH-50	-120.497	20	-195.394	20	-148.833	20	-173.817		-29.7067	2	-29.8599	2	-21.86	2	-26.7862		-120.497	20	-199.659	20	-148.833	20	-180.286		-29.7067	2	-29.8599	2	-21.86	2	-26.7862
CH-51	-120.497	20	-186.309	20	-148.265	20	-175.52		-29.7067	2	-29.6811	2	-21.86	2	-26.478		-120.497	20	-190.622	20	-148.265	20	-194		-29.7067	2	-29.6811	2	-21.86	2	-26.478
CH-52	-120.497	20	-176.656	20	-151.672	20	-189.148		-29.7067	2	-29.8152	2	-21.86	2	-25.1258		-120.497	20	-181.02	20	-151.672	20	-198.571		-29.7067	2	-29.8152	2	-21.86	2	-25.1258
CH-53	-120.497	20	-178.36	20	-159.054	20	-185.741		-29.7067	2	-29.7258	2	-21.86	2	-24.761		-120.497	20	-182.714	20	-159.054	20	-204.286		-29.7067	2	-29.7258	2	-21.86	2	-24.761
CH-54	-120.497	20	-185.741	20	-161.325	20	-182.902		-29.7067	2	-29.8599	2	-21.86	2	-24.805		-120.497	20	-190.057	20	-161.325	20	-207		-29.7067	2	-29.8599	2	-21.86	2	-24.805
CH-55	-120.497	20	-180.631	20	-156.215	20	-170.978		-29.7067	2	-29.6364	2	-21.86	2	-25.4214		-120.497	20	-184.974	20	-156.215	20	-204.143		-29.7067	2	-29.6364	2	-21.86	2	-25.4214
CH-56	-120.497	20	-178.927	20	-157.918	20	-156.782		-29.7067	2	-29.1445	2	-21.86	2	-25.5535		-120.497	20	-183.279	20	-157.918	20	-211		-29.7067	2	-29.1445	2	-21.86	2	-25.5535
CH-57	-120.497	20	-177.792	20	-161.325	20	-166.435		-29.7067	2	-29.0997	2	-21.86	2	-25.8176		-120.497	20	-182.149	20	-161.325	20	-192.143		-29.7067	2	-29.0997	2	-21.86	2	-25.8176
CH-58	-120.497	20	-180.063	20	-158.486	20	-163.596		-29.7067	2	-28.9656	2	-21.86	2	-26.0377		-120.497	20	-184.409	20	-158.486	20	-190.429		-29.7067	2	-28.9656	2	-21.86	2	-26.0377
CH-59	-120.497	20	-177.792	20	-164.164	20	-156.782		-29.7067	2	-28.8762	2	-21.86	2	-26.2138		-120.497	20	-182.149	20	-164.164	20	-184.714		-29.7067	2	-28.8762	2	-21.86	2	-26.2138
CH-60	-120.497	20	-182.334	20	-162.461	20	-157.918		-29.7067	2	-29.5916	2	-21.86	2	-26.1698		-120.497	20	-186.668	20	-162.461	20	-195.23		-29.7067	2	-29.5916	2	-21.86	2	-26.1698
CH-61	-120.497	20	-182.334	20	-165.868	20	-161.325		-29.7067	2	-30.2624	2	-21.86	2	-26.9371		-120.497	20	-186.668	20	-165.868	20	-187		-29.7067	2	-30.2624	2	-21.86	2	-26.9371
CH-62	-120.497	20	-184.606	20	-167.003	20	-152.24		-29.7067	2	-30.486	2	-21.86	2	-26.5849		-120.497	20	-188.927	20	-167.003	20	-192.714		-29.7067	2	-30.486	2	-21.86	2	-26.5849
CH-63	-120.497	20	-183.47	20	-168.139	20	-159.621		-29.7067	2	-30.6649	2	-21.86	2	-25.9686		-120.497	20	-187.798	20	-168.139	20	-210.429		-29.7067	2	-30.6649	2	-21.86	2	-25.9686
CH-64	-120.497	20	-186.309	20	-165.868	20	-153.943		-29.7067	2	-30.7543	2	-21.86	2	-24.8679		-120.497	20	-190.6	20	-165.868	20	-211		-29.7067	2	-30.7543	2	-21.86	2	-24.8679

## Sheet: Bayesian
	nC23							nC25
Sample	Fossil	SD	Terrestrial	SD	Aquatic	SD		Fossil	SD	Terrestrial	SD	Aquatic	SD
EH-1	0.152	0.122	0.566	0.115	0.282	0.06		0.114	0.085	0.736	0.12	0.15	0.067
EH-2	0.187	0.147	0.494	0.126	0.32	0.062		0.349	0.218	0.543	0.224	0.108	0.054
EH-3	0.196	0.151	0.459	0.137	0.345	0.063		0.343	0.227	0.55	0.236	0.107	0.054
EH-4	0.185	0.143	0.452	0.129	0.363	0.063		0.151	0.116	0.721	0.141	0.128	0.063
EH-5	0.176	0.132	0.388	0.115	0.437	0.063		0.253	0.174	0.608	0.187	0.139	0.063
EH-6	0.174	0.121	0.359	0.106	0.467	0.061		0.266	0.133	0.525	0.16	0.209	0.073
EH-7	0.146	0.108	0.466	0.11	0.388	0.063		0.112	0.079	0.617	0.131	0.272	0.093
EH-8	0.158	0.115	0.463	0.11	0.379	0.061		0.142	0.091	0.575	0.135	0.283	0.085
EH-9	0.173	0.13	0.496	0.125	0.332	0.061		0.147	0.09	0.516	0.139	0.337	0.09
EH-10	0.165	0.119	0.423	0.114	0.412	0.058		0.231	0.12	0.382	0.153	0.386	0.08
EH-11	0.149	0.106	0.423	0.11	0.428	0.062		0.211	0.112	0.433	0.162	0.356	0.089
EH-12	0.134	0.092	0.421	0.1	0.445	0.063		0.185	0.094	0.414	0.148	0.4	0.093
EH-13	0.154	0.103	0.314	0.099	0.532	0.062		0.234	0.106	0.313	0.143	0.453	0.093
EH-14	0.139	0.089	0.262	0.095	0.599	0.068		0.168	0.085	0.292	0.128	0.54	0.092
EH-15	0.114	0.073	0.221	0.078	0.665	0.068		0.196	0.093	0.297	0.134	0.508	0.096
EH-16	0.075	0.046	0.144	0.062	0.781	0.067		0.337	0.12	0.212	0.123	0.45	0.1
EH-17	0.069	0.044	0.125	0.057	0.807	0.065		0.351	0.12	0.213	0.116	0.436	0.095
EH-18	0.067	0.043	0.124	0.055	0.808	0.063		0.363	0.116	0.236	0.116	0.401	0.092
EH-19	0.086	0.055	0.165	0.065	0.749	0.064		0.226	0.095	0.273	0.126	0.501	0.098
EH-20	0.115	0.074	0.255	0.084	0.63	0.064		0.122	0.072	0.442	0.138	0.436	0.108
EH-21	0.091	0.057	0.218	0.073	0.692	0.064		0.136	0.077	0.429	0.136	0.435	0.102
EH-22	0.098	0.06	0.245	0.079	0.657	0.065		0.122	0.072	0.497	0.143	0.38	0.106
EH-23	0.094	0.059	0.224	0.078	0.683	0.067		0.2	0.087	0.34	0.147	0.46	0.11
EH-24	0.112	0.068	0.261	0.086	0.627	0.065		0.346	0.118	0.232	0.126	0.423	0.1
EH-25	0.148	0.097	0.331	0.113	0.521	0.069		0.212	0.101	0.397	0.164	0.391	0.104
EH-26	0.139	0.09	0.34	0.106	0.521	0.07		0.221	0.104	0.43	0.163	0.348	0.102
EH-27	0.109	0.068	0.314	0.1	0.576	0.074		0.108	0.064	0.441	0.15	0.451	0.126
EH-28	0.113	0.073	0.344	0.103	0.543	0.076		0.096	0.059	0.453	0.149	0.451	0.129
EH-29	0.112	0.07	0.326	0.099	0.562	0.072		0.099	0.057	0.35	0.143	0.551	0.129
EH-30	0.116	0.071	0.317	0.1	0.567	0.074		0.099	0.056	0.4	0.149	0.501	0.13
EH-31	0.091	0.054	0.226	0.08	0.683	0.07		0.107	0.062	0.399	0.147	0.494	0.124
EH-32	0.079	0.046	0.185	0.073	0.737	0.068		0.109	0.063	0.379	0.14	0.512	0.115
EH-33	0.096	0.057	0.261	0.092	0.643	0.077		0.087	0.054	0.371	0.154	0.542	0.14
EH-34	0.104	0.064	0.304	0.099	0.592	0.078		0.082	0.052	0.364	0.154	0.554	0.144
EH-35	0.111	0.07	0.335	0.1	0.554	0.072		0.123	0.06	0.33	0.143	0.548	0.12
EH-36	0.108	0.064	0.267	0.086	0.625	0.069		0.1	0.053	0.261	0.116	0.64	0.104
EH-37	0.115	0.072	0.337	0.095	0.548	0.069		0.093	0.053	0.268	0.117	0.639	0.108
EH-38	0.108	0.073	0.414	0.106	0.477	0.078		0.108	0.058	0.296	0.12	0.596	0.101
EH-39	0.107	0.065	0.3	0.097	0.593	0.074		0.106	0.06	0.328	0.127	0.566	0.103
EH-40	0.104	0.062	0.293	0.096	0.603	0.074		0.094	0.055	0.303	0.129	0.602	0.114
EH-41	0.103	0.063	0.272	0.092	0.625	0.073		0.1	0.058	0.316	0.128	0.584	0.109
EH-42	0.081	0.048	0.21	0.076	0.708	0.069		0.091	0.052	0.257	0.108	0.653	0.098
EH-43	0.079	0.048	0.203	0.077	0.717	0.069		0.091	0.051	0.222	0.101	0.687	0.094
EH-44	0.078	0.045	0.184	0.076	0.737	0.072		0.136	0.075	0.324	0.131	0.54	0.093
EH-45	0.085	0.05	0.22	0.087	0.695	0.076		0.094	0.054	0.238	0.104	0.668	0.093
EH-46	0.096	0.06	0.238	0.086	0.667	0.071		0.081	0.049	0.204	0.098	0.714	0.095
	nC23							nC25
	Fossil	SD	Terrestrial	SD	Aquatic	SD		Fossil	SD	Terrestrial	SD	Aquatic	SD
CH-1	0.217	0.177	0.488	0.132	0.295	0.086		0.15	0.063	0.482	0.061	0.368	0.042
CH-2	0.21	0.173	0.51	0.152	0.28	0.087		0.151	0.066	0.521	0.07	0.328	0.054
CH-3	0.247	0.213	0.515	0.179	0.237	0.098		0.15	0.064	0.523	0.069	0.327	0.054
CH-4	0.232	0.18	0.42	0.152	0.348	0.081		0.148	0.06	0.515	0.065	0.337	0.048
CH-5	0.228	0.182	0.452	0.154	0.32	0.084		0.15	0.062	0.489	0.064	0.361	0.044
CH-6	0.226	0.179	0.485	0.16	0.289	0.086		0.149	0.06	0.513	0.068	0.338	0.047
CH-7	0.228	0.181	0.466	0.155	0.306	0.083		0.15	0.062	0.492	0.065	0.358	0.043
CH-8	0.211	0.164	0.447	0.156	0.342	0.08		0.154	0.066	0.496	0.071	0.351	0.046
CH-9	0.221	0.168	0.472	0.164	0.307	0.085		0.15	0.062	0.488	0.071	0.362	0.045
CH-10	0.234	0.186	0.498	0.161	0.268	0.094		0.155	0.071	0.51	0.071	0.335	0.051
CH-11	0.241	0.186	0.463	0.164	0.296	0.089		0.154	0.068	0.498	0.068	0.348	0.046
CH-12	0.241	0.18	0.444	0.164	0.315	0.084		0.153	0.065	0.51	0.071	0.337	0.051
CH-13	0.228	0.174	0.437	0.163	0.335	0.082		0.151	0.062	0.493	0.068	0.356	0.044
CH-14	0.213	0.161	0.438	0.151	0.349	0.079		0.149	0.06	0.476	0.07	0.374	0.048
CH-15	0.225	0.182	0.5	0.162	0.275	0.09		0.149	0.059	0.475	0.07	0.376	0.048
CH-16	0.219	0.189	0.558	0.171	0.223	0.097		0.152	0.067	0.52	0.073	0.328	0.054
CH-17	0.226	0.192	0.529	0.166	0.246	0.094		0.15	0.065	0.537	0.075	0.313	0.06
CH-18	0.211	0.176	0.51	0.149	0.279	0.088		0.148	0.062	0.536	0.075	0.316	0.059
CH-19	0.205	0.171	0.539	0.143	0.257	0.092		0.147	0.062	0.539	0.073	0.314	0.06
CH-20	0.184	0.156	0.557	0.133	0.259	0.091		0.147	0.064	0.543	0.076	0.311	0.062
CH-21	0.201	0.17	0.532	0.144	0.267	0.09		0.151	0.064	0.502	0.065	0.347	0.046
CH-22	0.18	0.149	0.539	0.138	0.281	0.087		0.149	0.061	0.496	0.065	0.355	0.044
CH-23	0.18	0.145	0.545	0.138	0.275	0.089		0.151	0.063	0.509	0.068	0.34	0.048
CH-24	0.159	0.122	0.428	0.123	0.412	0.07		0.151	0.064	0.503	0.067	0.346	0.046
CH-25	0.141	0.1	0.379	0.114	0.48	0.072		0.152	0.066	0.514	0.069	0.334	0.051
CH-26	0.107	0.069	0.263	0.112	0.63	0.099		0.149	0.06	0.471	0.07	0.38	0.047
CH-27	0.134	0.088	0.353	0.116	0.513	0.081		0.142	0.052	0.468	0.07	0.391	0.055
CH-28	0.098	0.063	0.255	0.124	0.647	0.113		0.149	0.06	0.507	0.071	0.344	0.05
CH-29	0.105	0.068	0.261	0.118	0.634	0.104		0.146	0.058	0.504	0.068	0.35	0.047
CH-30	0.11	0.074	0.292	0.112	0.598	0.093		0.143	0.054	0.486	0.064	0.372	0.047
CH-31	0.124	0.082	0.32	0.119	0.556	0.09		0.142	0.053	0.476	0.069	0.382	0.051
CH-32	0.081	0.053	0.21	0.123	0.709	0.126		0.145	0.056	0.5	0.066	0.355	0.046
CH-33	0.105	0.067	0.279	0.119	0.615	0.104		0.145	0.057	0.511	0.071	0.343	0.05
CH-34	0.123	0.083	0.352	0.115	0.525	0.084		0.151	0.064	0.501	0.071	0.348	0.048
CH-35	0.133	0.095	0.449	0.124	0.418	0.08		0.149	0.061	0.51	0.072	0.341	0.051
CH-36	0.148	0.113	0.532	0.143	0.32	0.089		0.141	0.053	0.502	0.069	0.356	0.048
CH-37	0.132	0.091	0.386	0.12	0.482	0.078		0.148	0.062	0.537	0.079	0.315	0.062
CH-38	0.12	0.078	0.307	0.115	0.573	0.09		0.149	0.061	0.526	0.074	0.325	0.057
CH-39	0.106	0.067	0.265	0.118	0.629	0.105		0.151	0.065	0.525	0.078	0.324	0.059
CH-40	0.116	0.077	0.282	0.115	0.602	0.096		0.148	0.061	0.519	0.07	0.333	0.052
CH-41	0.121	0.08	0.3	0.116	0.579	0.092		0.144	0.057	0.489	0.066	0.367	0.045
CH-42	0.112	0.074	0.282	0.116	0.606	0.095		0.14	0.052	0.458	0.076	0.403	0.064
CH-43	0.114	0.073	0.29	0.116	0.596	0.093		0.134	0.048	0.432	0.089	0.434	0.088
CH-44	0.107	0.069	0.275	0.119	0.618	0.102		0.134	0.049	0.44	0.087	0.426	0.085
CH-45	0.12	0.084	0.37	0.123	0.51	0.088		0.14	0.052	0.483	0.07	0.377	0.053
CH-46	0.128	0.097	0.446	0.131	0.426	0.085		0.139	0.051	0.487	0.068	0.374	0.052
CH-47	0.123	0.081	0.34	0.125	0.537	0.09		0.143	0.055	0.5	0.07	0.357	0.047
CH-48	0.101	0.063	0.269	0.123	0.63	0.11		0.143	0.056	0.502	0.07	0.355	0.047
CH-49	0.113	0.072	0.289	0.118	0.599	0.097		0.144	0.055	0.488	0.067	0.368	0.047
CH-50	0.133	0.09	0.335	0.122	0.532	0.085		0.144	0.056	0.491	0.067	0.365	0.046
CH-51	0.142	0.098	0.379	0.123	0.479	0.08		0.14	0.054	0.489	0.067	0.37	0.049
CH-52	0.149	0.11	0.441	0.127	0.41	0.075		0.133	0.048	0.446	0.084	0.421	0.081
CH-53	0.147	0.106	0.388	0.127	0.464	0.077		0.131	0.046	0.438	0.091	0.431	0.091
CH-54	0.102	0.065	0.249	0.118	0.649	0.108		0.131	0.046	0.436	0.092	0.433	0.092
CH-55	0.119	0.078	0.301	0.121	0.58	0.097		0.135	0.048	0.458	0.079	0.407	0.072
CH-56	0.138	0.091	0.351	0.125	0.511	0.085		0.134	0.047	0.472	0.072	0.394	0.063
CH-57	0.147	0.1	0.368	0.13	0.485	0.081		0.138	0.05	0.479	0.07	0.384	0.056
CH-58	0.142	0.095	0.372	0.132	0.486	0.086		0.14	0.052	0.484	0.071	0.376	0.053
CH-59	0.151	0.104	0.386	0.135	0.463	0.082		0.144	0.055	0.488	0.07	0.368	0.049
CH-60	0.161	0.11	0.379	0.133	0.46	0.078		0.139	0.051	0.479	0.069	0.382	0.053
CH-61	0.123	0.08	0.29	0.114	0.586	0.089		0.144	0.055	0.488	0.066	0.368	0.045
CH-62	0.124	0.081	0.279	0.116	0.597	0.091		0.141	0.054	0.477	0.068	0.382	0.05
CH-63	0.144	0.095	0.319	0.117	0.537	0.079		0.136	0.05	0.456	0.077	0.408	0.068
CH-64	0.16	0.113	0.352	0.121	0.488	0.073		0.13	0.047	0.423	0.098	0.446	0.1
